# Supplementary material for: Molecular convolutional neural networks with DNA regulatory circuits
Source: Research Square preprint supplement (doi:10.21203/rs.3.rs-926838/v1), 2021-10-21
Supplement: Supplementary file 1 [file 1ca93d37a2ad002a6a27642a.xlsx]

## Sheet: weight multiplication
Supplementary Fig. 4	sequence (from 5' to 3')
Rep	GATGGATTGGAGTATGTGGT /FAM/
Rep*	/BHQ-1/ ACCACATACTCCAATCCATC TTCTCTTC
the length of toehold A
P	GGAGTAGGAAGAGAA GAGAA GATGGATTGGAGTATGTGGT
B-B7	ATGTCGA CGGACTGAGAGTGGATATATTGCAGTCCG
W-B7	CGGACTGCAATATATCCACTCTCAGTCCG TCGACAT
A-A7	TCTTCTCTTCTCTTCCTACTCC CGGACTG CAATATATCCACTCT CAGTCCG CCTCAGC
A-A10	TCTTCTCTTCTCTTCCTACTCC CGGACTG CAATATATCCACTCT CAGTCCG CCCAGCTAAC
A-A12	TCTTCTCTTCTCTTCCTACTCC CGGACTG CAATATATCCACTCT CAGTCCG CCCAGCTAACAC
X-A7	AAAAAAAAAA GCTGAGG TT GGAGTAGGAAGAGAAGAGAAGA
X-A10	AAAAAAAAAA GTTAGCTGGG TT GGAGTAGGAAGAGAAGAGAAGA
X-A12	AAAAAAAAAA GTGTTAGCTGGG TT GGAGTAGGAAGAGAAGAGAAGA
the length of toehold B
P	GGAGTAGGAAGAGAA GAGAA GATGGATTGGAGTATGTGGT
A-A7	TCTTCTCTTCTCTTCCTACTCC CGGACTG CAATATATCCACTCT CAGTCCG CCTCAGC
X-A7	AAAAAAAAAA GCTGAGG TTGGAGTAGGAAGAGAAGAGAAGA
B-B6	TGTCGA CGGACTGAGAGTGGATATATTGCAGTCCG
B-B8	CATGTCGA CGGACTGAGAGTGGATATATTGCAGTCCG
B-B10	CAACTGTCGA CGGACTGAGAGTGGATATATTGCAGTCCG
W-B6	CGGACTGCAATATATCCACTCTCAGTCCG TCGACA
W-B8	CGGACTGCAATATATCCACTCTCAGTCCG TCGACATG
W-B10	CGGACTGCAATATATCCACTCTCAGTCCG TCGACAGTTG
the length of spacer Sp
P	GGAGTAGGAAGAGAA GAGAA GATGGATTGGAGTATGTGGT
B-B7	ATGTCGA CGGACTGAGAGTGGATATATTGCAGTCCG
W-B7	CGGACTGCAATATATCCACTCTCAGTCCG TCGACAT
A-A7	TCTTCTCTTCTCTTCCTACTCC CGGACTG CAATATATCCACTCT CAGTCCG CCTCAGC
X-Sp0	AAAAAAAAAA GCTGAGG GGAGTAGGAAGAGAAGAGAAGA
X-Sp2	AAAAAAAAAA GCTGAGG TT GGAGTAGGAAGAGAAGAGAAGA
X-Sp5	AAAAAAAAAA GCTGAGG TTTTT GGAGTAGGAAGAGAAGAGAAGA
the length of stem St
P	GGAGTAGGAAGAGAA GAGAA GATGGATTGGAGTATGTGGT
X-A7	AAAAAAAAAA GCTGAGG TTGGAGTAGGAAGAGAAGAGAAGA
B-St5	ATGTCGA GACTGAGAGTGGATATATTGCAGTC
W-St5	GACTGCAATATATCCACTCTCAGTC TCGACAT
A-St5	TCTTCTCTTCTCTTCCTACTCC GACTG CAATATATCCACTCT CAGTC CCTCAGC
B-St7	ATGTCGA CGGACTGAGAGTGGATATATTGCAGTCCG
W-St7	CGGACTGCAATATATCCACTCTCAGTCCG TCGACAT
A-St7	TCTTCTCTTCTCTTCCTACTCC CGGACTG CAATATATCCACTCT CAGTCCG CCTCAGC
B-St8	ATGTCGA CAGGACTGAGAGTGGATATATTGCAGTCCTG
W-St8	CAGGACTGCAATATATCCACTCTCAGTCCTG TCGACAT
A-St8	TCTTCTCTTCTCTTCCTACTCC CAGGACTG CAATATATCCACTCT CAGTCCTG CCTCAGC
Supplementary Fig. 6-8	sequence (from 5' to 3')
Rep	GATGGATTGGAGTATGTGGT /FAM/
Rep*	/BHQ-1/ ACCACATACTCCAATCCATC TTCTCTTC
P	GGAGTAGGAAGAGAA GAGAA GATGGATTGGAGTATGTGGT
B	ATGTCGA CGGACTGAGAGTGGATATTGCAGTCCG
W	CGGACTGCAATATCCACTCTCAGTCCG TCGACAT
A	TCTTCTCTTCTCTTCCTACTCC CGGACTG CAATATCCACTCT CAGTCCG CCCAGC
X	AAAAAAAAAA GCTGGG TT GGAGTAGGAAGAGAAGAGAAGA
Supplementary Fig. 9	sequence (from 5' to 3')
X1	AAAAAAAAAAAAAAA CTACTTC TT CAATCCCATCCTTCA TCT CA
X2	AAAAAAAAAAAAAAA CTCACTC TT CATCTAACCTCTTCA TCT CA
A1,1	TG AGA TGAAGGATGGGATTG CTAACCA ATGAGATTGTGGATA TGGTTAG GAAGTAG
A2,2	TG AGA TGAAGAGGTTAGATG CTTTCTA GGTGGTAGAATGAGA TAGAAAG GAGTGAG
P1,4	CAATCCCATCCTTCA TCT CATACCCTTATCCCA TCT CA
P2,5	CATCTAACCTCTTCA TCT CATACACCCTTAACA TCT CA
B1	CAACCAG CTAACCATATCCACAATCTCATTGGTTAG
B2	ACCTTAG CTTTCTATCTCATTCTACCACCTAGAAAG
W1	CTAACCAATGAGATTGTGGATATGGTTAG CTGGTTG
W2	CTTTCTAGGTGGTAGAATGAGATAGAAAG CTAAGGT
Rep4	CATACCCTTATCCCA TCT CA /FAM/
Rep4*	/BHQ-1/ TG AGA TGGGATAAGGGTATG AGA TG
Rep5	CATACACCCTTAACA TCT CA /ROX/
Rep5*	/BHQ-2/ TG AGA TGTTAAGGGTGTATG AGA TG
Supplementary Fig. 10	sequence (from 5' to 3')
X1	AAAAAAAAAAAAAAA CTACTTC TT CAATCCCATCCTTCA TCT CA
A1,1	TG AGA TGAAGGATGGGATTG CTAACCA ATGAGATTGTGGATA TGGTTAG GAAGTAG
A2,1	TG AGA TGAAGGATGGGATTG CTTTCTA GGTGGTAGAATGAGA TAGAAAG GAAGTAG
P1,4	CAATCCCATCCTTCA TCT CATACCCTTATCCCA TCT CA
P1,5	CAATCCCATCCTTCA TCT CATACACCCTTAACA TCT CA
B1	CAACCAG CTAACCATATCCACAATCTCATTGGTTAG
B2	ACCTTAG CTTTCTATCTCATTCTACCACCTAGAAAG
W1	CTAACCAATGAGATTGTGGATATGGTTAG CTGGTTG
W2	CTTTCTAGGTGGTAGAATGAGATAGAAAG CTAAGGT
Rep4	CATACCCTTATCCCA TCT CA /FAM/
Rep4*	/BHQ-1/ TG AGA TGGGATAAGGGTATG AGA TG
Rep5	CATACACCCTTAACA TCT CA /ROX/
Rep5*	/BHQ-2/ TG AGA TGTTAAGGGTGTATG AGA TG

## Sheet: MAC operation
Supplementary Fig. 11	sequence (from 5' to 3')
X1	AAAAAAAAAAAAAAA CTACTTC TT CAATCCCATCCTTCA TCT CA
X2	AAAAAAAAAAAAAAA CTCACTC TT CATCTAACCTCTTCA TCT CA
A1,1	TG AGA TGAAGGATGGGATTG CTAACCA ATGAGATTGTGGATA TGGTTAG GAAGTAG
A2,2	TG AGA TGAAGAGGTTAGATG CTTTCTA GGTGGTAGAATGAGA TAGAAAG GAGTGAG
P1,4	CAATCCCATCCTTCA TCT CATACCCTTATCCCA TCT CA
P2,4	CATCTAACCTCTTCA TCT CATACCCTTATCCCA TCT CA
B1	CAACCAG CTAACCATATCCACAATCTCATTGGTTAG
B2	ACCTTAG CTTTCTATCTCATTCTACCACCTAGAAAG
W1	CTAACCAATGAGATTGTGGATATGGTTAG CTGGTTG
W2	CTTTCTAGGTGGTAGAATGAGATAGAAAG CTAAGGT
Rep4	CATACCCTTATCCCA TCT CA /FAM/
Rep4*	/BHQ-1/ TG AGA TGGGATAAGGGTATG AGA TG
Supplementary Fig. 12	sequence (from 5' to 3')
X1	AAAAAAAAAAAAAAA CTACTTC TT CAATCCCATCCTTCA TCT CA
X2	AAAAAAAAAAAAAAA CTCACTC TT CATCTAACCTCTTCA TCT CA
X3	AAAAAAAAAAAAAAA CACTCTC TT CACTCCTAATCTTCA TCT CA
A1,1	TG AGA TGAAGGATGGGATTG CTAACCA ATGAGATTGTGGATA TGGTTAG GAAGTAG
A2,2	TG AGA TGAAGAGGTTAGATG CTTTCTA GGTGGTAGAATGAGA TAGAAAG GAGTGAG
A3,3	TG AGA TGAAGATTAGGAGTG CTTTCTA GGTGGTAGAATGAGA TAGAAAG GAGAGTG
P1,4	CAATCCCATCCTTCA TCT CATACCCTTATCCCA TCT CA
P2,4	CATCTAACCTCTTCA TCT CATACCCTTATCCCA TCT CA
P3,4	CACTCCTAATCTTCA TCT CATACCCTTATCCCA TCT CA
B1	CAACCAG CTAACCATATCCACAATCTCATTGGTTAG
B2	ACCTTAG CTTTCTATCTCATTCTACCACCTAGAAAG
B3	CCACTGC CTTTCTCAACTCTTCTCCAAACGAGAAAG
W1	CTAACCAATGAGATTGTGGATATGGTTAG CTGGTTG
W2	CTTTCTAGGTGGTAGAATGAGATAGAAAG CTAAGGT
W3	CTTTCTCGTTTGGAGAAGAGTTGAGAAAGGCAGTGG
Rep4	CATACCCTTATCCCA TCT CA /FAM/
Rep4*	/BHQ-1/ TG AGA TGGGATAAGGGTATG AGA TG

## Sheet: convolution
strand name	sequence (from 5' to 3')
X1	AAAAAAAAAAAAAAA CTACTTC TT CAATCCCATCCTTCA TCT CA
X2	AAAAAAAAAAAAAAA CACTTCC TT CAAACTCCTCTAACA TCT CA
X3	AAAAAAAAAAAAAAA CACTCTC TT CACTCCTAATCTTCA TCT CA
X4	AAAAAAAAAAAAAAA CTCACTC TT CATCTAACCTCTTCA TCT CA
A1,1	TG AGA TGAAGGATGGGATTG CTAACCA ATGAGATTGTGGATA TGGTTAG GAAGTAG
A1,2	TG AGA TGTTAGAGGAGTTTG CTAACCA ATGAGATTGTGGATA TGGTTAG GGAAGTG
A2,3	TG AGA TGAAGATTAGGAGTG CTTTCTA GGTGGTAGAATGAGA TAGAAAG GAGAGTG
A2,4	TG AGA TGAAGAGGTTAGATG CTTTCTA GGTGGTAGAATGAGA TAGAAAG GAGTGAG
P1,4	CAATCCCATCCTTCA TCT CATACCCTTATCCCA TCT CA
P3,4	CACTCCTAATCTTCA TCT CATACCCTTATCCCA TCT CA
P2,6	CAAACTCCTCTAACA TCT CATACACCCTTAACA TCT CA
P4,6	CATCTAACCTCTTCA TCT CATACACCCTTAACA TCT CA
B1	CAACCAG CTAACCATATCCACAATCTCATTGGTTAG
B2	ACCTTAG CTTTCTATCTCATTCTACCACCTAGAAAG
W1	CTAACCAATGAGATTGTGGATATGGTTAG CTGGTTG
W2	CTTTCTAGGTGGTAGAATGAGATAGAAAG CTAAGGT
Ss4,5	CATACCCTTATCCCA TCT CATCACTTCCTTTCA TCT CA
Ss4,5*	TG AGA TGGGATAAGGGTATG AGA TG
Ss6,7	CATACACCCTTAACA TCT CACCTATCTTTCTAC TCT AC
Ss6,7*	TG AGA TGTTAAGGGTGTATG AGA TG
Rep5	CATCACTTCCTTTCA TCT CA /FAM/
Rep5*	/BHQ-1/ TGAGATGAAAGGAAGTGATG AGA TG
Rep7	CACCTATCTTTCTAC TCT AC /ROX/
Rep7*	/BHQ-2/ GTAGAGTAGAAAGATAGGTG AGA TG

## Sheet: two-rotated patterns
strand name	sequence (from 5' to 3')
X15	AAAAAAAAAAAAAAA CCA TCT TT CACACCTCCCAATCA TCT CA
X16	AAAAAAAAAAAAAAA CCA TCT TT CACAAACCTACACCA TCT CA
X17	AAAAAAAAAAAAAAA CCA TCT TT CATTACTTATCCACA TCT CA
X18	AAAAAAAAAAAAAAA CCA TCT TT CAATCTCTCCAAACA TCT CA
X19	AAAAAAAAAAAAAAA CCA TCT TT CACACCAACAACTCA TCT CA
X20	AAAAAAAAAAAAAAA CCA TCT TT CAAACAACTTTTCCA TCT CA
X21	AAAAAAAAAAAAAAA CCA TCT TT CATAACATATCACCA TCT CA
X26	AAAAAAAAAAAAAAA CCA TCT TT CATTCACTATCTACA TCT CA
X27	AAAAAAAAAAAAAAA CCA TCT TT CAATCTACCAAAACA TCT CA
X28	AAAAAAAAAAAAAAA CCA TCT TT CATTTCACAACACCA TCT CA
X29	AAAAAAAAAAAAAAA CCA TCT TT CACCATCAACTATCA TCT CA
X30	AAAAAAAAAAAAAAA CCA TCT TT CAACTATACAATCCA TCT CA
X31	AAAAAAAAAAAAAAA CCA TCT TT CACTTCAACACACCA TCT CA
X32	AAAAAAAAAAAAAAA CCA TCT TT CAACTCTCTACATCA TCT CA
X33	AAAAAAAAAAAAAAA CCA TCT TT CACATCATCATATCA TCT CA
X34	AAAAAAAAAAAAAAA CCA TCT TT CATATCATACTCCCA TCT CA
X38	AAAAAAAAAAAAAAA CCA TCT TT CAATTCTCCTACCCA TCT CA
X39	AAAAAAAAAAAAAAA CCA TCT TT CATTACACACCCACA TCT CA
X40	AAAAAAAAAAAAAAA CCA TCT TT CAATCAAACATCCCA TCT CA
X41	AAAAAAAAAAAAAAA CCA TCT TT CACCTTACCAAACCA TCT CA
X42	AAAAAAAAAAAAAAA CCA TCT TT CACCTTCAAATCCCA TCT CA
X43	AAAAAAAAAAAAAAA CCA TCT TT CAATACCCACTCTCA TCT CA
X44	AAAAAAAAAAAAAAA CCA TCT TT CAACTCCTACTATCA TCT CA
X45	AAAAAAAAAAAAAAA CCA TCT TT CACCTACTCTCCTCA TCT CA
X46	AAAAAAAAAAAAAAA CCA TCT TT CACATCCATACCTCA TCT CA
X47	AAAAAAAAAAAAAAA CCA TCT TT CATCTTCCTCCCACA TCT CA
X50	AAAAAAAAAAAAAAA CCA TCT TT CATCTCCTTCTACCA TCT CA
X51	AAAAAAAAAAAAAAA CCA TCT TT CACTTCTACAATTCA TCT CA
X52	AAAAAAAAAAAAAAA CCA TCT TT CAACCTTCTCCTCCA TCT CA
X53	AAAAAAAAAAAAAAA CCA TCT TT CAAACTCCTCTAACA TCT CA
X54	AAAAAAAAAAAAAAA CCA TCT TT CACTCTCTTCAACCA TCT CA
X55	AAAAAAAAAAAAAAA CCA TCT TT CATCCCATTTCAACA TCT CA
X56	AAAAAAAAAAAAAAA CCA TCT TT CATTTCTCATCACCA TCT CA
X57	AAAAAAAAAAAAAAA CCA TCT TT CATCAAATCTACTCA TCT CA
X58	AAAAAAAAAAAAAAA CCA TCT TT CACTCCTAATCTTCA TCT CA
X59	AAAAAAAAAAAAAAA CCA TCT TT CAACCTCTCCTATCA TCT CA
X62	AAAAAAAAAAAAAAA CCA TCT TT CAATCTTATCATCCA TCT CA
X63	AAAAAAAAAAAAAAA CCA TCT TT CAACCAACATAACCA TCT CA
X64	AAAAAAAAAAAAAAA CCA TCT TT CATAACCTTTCTTCA TCT CA
X65	AAAAAAAAAAAAAAA CCA TCT TT CAACATACCAAATCA TCT CA
X66	AAAAAAAAAAAAAAA CCA TCT TT CATCCACACTCTTCA TCT CA
X67	AAAAAAAAAAAAAAA CCA TCT TT CAACCATACCACTCA TCT CA
X68	AAAAAAAAAAAAAAA CCA TCT TT CATTCTTCACTAACA TCT CA
X69	AAAAAAAAAAAAAAA CCA TCT TT CACACTAACTCTCCA TCT CA
X70	AAAAAAAAAAAAAAA CCA TCT TT CACCACAACCTACCA TCT CA
X71	AAAAAAAAAAAAAAA CCA TCT TT CACCTTTACATTCCA TCT CA
X74	AAAAAAAAAAAAAAA CCA TCT TT CAACATTCCTCTACA TCT CA
X75	AAAAAAAAAAAAAAA CCA TCT TT CACCTCTACTACTCA TCT CA
X76	AAAAAAAAAAAAAAA CCA TCT TT CAACACTTTCCTACA TCT CA
X77	AAAAAAAAAAAAAAA CCA TCT TT CACACAATACCTCCA TCT CA
X78	AAAAAAAAAAAAAAA CCA TCT TT CAATCCCATCCTTCA TCT CA
X79	AAAAAAAAAAAAAAA CCA TCT TT CATTTCCTATCCTCA TCT CA
X80	AAAAAAAAAAAAAAA CCA TCT TT CACTCTCATAATCCA TCT CA
X81	AAAAAAAAAAAAAAA CCA TCT TT CAATCATCTATTCCA TCT CA
X82	AAAAAAAAAAAAAAA CCA TCT TT CACATCTTCTTCCCA TCT CA
X83	AAAAAAAAAAAAAAA CCA TCT TT CAATTCATCATCTCA TCT CA
X86	AAAAAAAAAAAAAAA CCA TCT TT CAACCCACAAAACCA TCT CA
X87	AAAAAAAAAAAAAAA CCA TCT TT CAAAACATACTTCCA TCT CA
X88	AAAAAAAAAAAAAAA CCA TCT TT CAACCACACACATCA TCT CA
X89	AAAAAAAAAAAAAAA CCA TCT TT CACACATTCAACCCA TCT CA
X90	AAAAAAAAAAAAAAA CCA TCT TT CATCTAACCTCTTCA TCT CA
X91	AAAAAAAAAAAAAAA CCA TCT TT CAATACTACCTTCCA TCT CA
X92	AAAAAAAAAAAAAAA CCA TCT TT CATCCTCAACACCCA TCT CA
X93	AAAAAAAAAAAAAAA CCA TCT TT CACACCCTCACTACA TCT CA
X94	AAAAAAAAAAAAAAA CCA TCT TT CACCTCACATTTCCA TCT CA
X95	AAAAAAAAAAAAAAA CCA TCT TT CATCAATCACTACCA TCT CA
X98	AAAAAAAAAAAAAAA CCA TCT TT CATCCTAACCTAACA TCT CA
X99	AAAAAAAAAAAAAAA CCA TCT TT CACTCTTCTTTCCCA TCT CA
X100	AAAAAAAAAAAAAAA CCA TCT TT CAAACACCTCATCCA TCT CA
X101	AAAAAAAAAAAAAAA CCA TCT TT CACTCCACAACTACA TCT CA
X102	AAAAAAAAAAAAAAA CCA TCT TT CAAACTACACAATCA TCT CA
X103	AAAAAAAAAAAAAAA CCA TCT TT CATCTTTCCATCCCA TCT CA
X104	AAAAAAAAAAAAAAA CCA TCT TT CATCCATCCTACACA TCT CA
X105	AAAAAAAAAAAAAAA CCA TCT TT CACAACTTCCCACCA TCT CA
X106	AAAAAAAAAAAAAAA CCA TCT TT CACCAATCATACCCA TCT CA
X107	AAAAAAAAAAAAAAA CCA TCT TT CAAATCCACCAACCA TCT CA
X110	AAAAAAAAAAAAAAA CCA TCT TT CAATCACCCTATACA TCT CA
X111	AAAAAAAAAAAAAAA CCA TCT TT CACCCTCCCTTCTCA TCT CA
X112	AAAAAAAAAAAAAAA CCA TCT TT CATCACATACCTACA TCT CA
X113	AAAAAAAAAAAAAAA CCA TCT TT CAAATCTTTCACCCA TCT CA
X114	AAAAAAAAAAAAAAA CCA TCT TT CAATCCTATTCAACA TCT CA
X115	AAAAAAAAAAAAAAA CCA TCT TT CAAACATTCTACACA TCT CA
X116	AAAAAAAAAAAAAAA CCA TCT TT CAAAACTATTCCTCA TCT CA
X117	AAAAAAAAAAAAAAA CCA TCT TT CAACTAACCTTCACA TCT CA
X118	AAAAAAAAAAAAAAA CCA TCT TT CACCACTATACTCCA TCT CA
X119	AAAAAAAAAAAAAAA CCA TCT TT CACTACATTCTCCCA TCT CA
X123	AAAAAAAAAAAAAAA CCA TCT TT CACACACTCAATCCA TCT CA
X124	AAAAAAAAAAAAAAA CCA TCT TT CAAACCTCCCTCCCA TCT CA
X125	AAAAAAAAAAAAAAA CCA TCT TT CATCCAACTCTACCA TCT CA
X126	AAAAAAAAAAAAAAA CCA TCT TT CATTCATCTCTTCCA TCT CA
X127	AAAAAAAAAAAAAAA CCA TCT TT CACCTCCTTTACCCA TCT CA
X128	AAAAAAAAAAAAAAA CCA TCT TT CAACAATCTCATACA TCT CA
X129	AAAAAAAAAAAAAAA CCA TCT TT CACCATAACTTCTCA TCT CA
X130	AAAAAAAAAAAAAAA CCA TCT TT CATCTACCTATCACA TCT CA
A9,15	TG AGA TGATTGGGAGGTGTG CCTTCTCGAAAGAGTTAAGAGAGAAGG AGA TGG
A10,16	TG AGA TGGTGTAGGTTTGTG CTAACCAATGGATGTGGATATGGTTAG AGA TGG
A11,17	TG AGA TGTGGATAAGTAATG CTTTCTAGGTGGGAATGAGATAGAAAG AGA TGG
A12,18	TG AGA TGTTTGGAGAGATTG CTTTCTCGTTTGGGAAGGTTGAGAAAG AGA TGG
A7,19	TG AGA TGAGTTGTTGGTGTG CCTTTCAATGAAAGAGGAAATGAAAGG AGA TGG
A8,20	TG AGA TGGAAAAGTTGTTTG CACTTTCTGAGGTGGGTTATGAAAGTG AGA TGG
A9,21	TG AGA TGGTGATATGTTATG CCTTCTCGAAAGAGTTAAGAGAGAAGG AGA TGG
A14,26	TG AGA TGTAGATAGTGAATG CTCTTACGAATAGGTAAAGTGTAAGAG AGA TGG
A15,27	TG AGA TGTTTTGGTAGATTG CCATACATGTGAAGTTGGATTGTATGG AGA TGG
A17,29	TG AGA TGATAGTTGATGGTG CACTCTCAAATCATAAAACAGAGAGTG AGA TGG
A18,30	TG AGA TGGATTGTATAGTTG CCACTCC CTACAACAAACTA GGAGTGG AGA TGG
A13,31	TG AGA TGGTGTGTTGAAGTG CAACTCTAAGGGTGGTAAAGAGAGTTG AGA TGG
A14,32	TG AGA TGATGTAGAGAGTTG CTCTTACGAATAGGTAAAGTGTAAGAG AGA TGG
A15,33	TG AGA TGATATGATGATGTG CCATACATGTGAAGTTGGATTGTATGG AGA TGG
A20,38	TG AGA TGGGTAGGAGAATTG CATTTCTTGTATGAGGAAGTAGAAATG AGA TGG
A23,41	TG AGA TGGTTTGGTAAGGTG CCACCTTAGTAGAAGTTTGGAAGGTGG AGA TGG
A24,42	TG AGA TGGGATTTGAAGGTG CATTTCTTAATGGAGTGATGAGAAATG AGA TGG
A19,43	TG AGA TGAGAGTGGGTATTG CATACATTAGTAGTTGGGATATGTATG AGA TGG
A20,44	TG AGA TGATAGTAGGAGTTG CATTTCTTGTATGAGGAAGTAGAAATG AGA TGG
A23,47	TG AGA TGTGGGAGGAAGATG CCACCTTAGTAGAAGTTTGGAAGGTGG AGA TGG
A27,51	TG AGA TGAATTGTAGAAGTG CTATCCAGGTTGAGTTGTTATGGATAG AGA TGG
A28,52	TG AGA TGGAGGAGAAGGTTG CATTACAGAATTGTGGGAAATGTAATG AGA TGG
A30,54	TG AGA TGGTTGAAGAGAGTG CAATCCATTTGTATGAAGAGTGGATTG AGA TGG
A27,57	TG AGA TGAGTAGATTTGATG CTATCCATAACAACTCAACCTGGATAG AGA TGG
A28,58	TG AGA TGAAGATTAGGAGTG CATTACAGAATTGTGGGAAATGTAATG AGA TGG
A32,62	TG AGA TGGATGATAAGATTG CTCTCTTTATTGGTGTGTTGAAGAGAG AGA TGG
A33,63	TG AGA TGGTTATGTTGGTTG CTATACATATTGTTTGGTGGTGTATAG AGA TGG
A35,65	TG AGA TGATTTGGTATGTTG CAACAAAGATTGGTGATTGATTTGTTG AGA TGG
A36,66	TG AGA TGAAGAGTGTGGATG CTCCACTGAGTGATTAGAATAGTGGAG AGA TGG
A31,67	TG AGA TGAGTGGTATGGTTG CCTAACCTGTAGAGTTGGAGGGTTAGG AGA TGG
A32,68	TG AGA TGTTAGTGAAGAATG CTCTCTTTATTGGTGTGTTGAAGAGAG AGA TGG
A33,69	TG AGA TGGAGAGTTAGTGTG CTATACATATTGTTTGGTGGTGTATAG AGA TGG
A35,71	TG AGA TGGAATGTAAAGGTG CAACAAAGATTGGTGATTGATTTGTTG AGA TGG
A2,74	TG AGA TGTAGAGGAATGTTG CTATCCTGAGGGTAGTTGAGAGGATAG AGA TGG
A3,75	TG AGA TGAGTAGTAGAGGTG CTTTTCTATTGATGGAGGTGAGAAAAG AGA TGG
A4,76	TG AGA TGTAGGAAAGTGTTG CCTATCTGAGGGAATTGTTAAGATAGG AGA TGG
A6,78	TG AGA TGAAGGATGGGATTG CCCAAACTGGATTTGTGAATGTTTGGG AGA TGG
A1,79	TG AGA TGAGGATAGGAAATG CTACAACTGTGTGTTTAGATGTTGTAG AGA TGG
A2,80	TG AGA TGGATTATGAGAGTG CTATCCTGAGGGTAGTTGAGAGGATAG AGA TGG
A3,81	TG AGA TGGAATAGATGATTG CTTTTCTATTGATGGAGGTGAGAAAAG AGA TGG
A4,82	TG AGA TGGGAAGAAGATGTG CCTATCTGAGGGAATTGTTAAGATAGG AGA TGG
A8,86	TG AGA TGGTTTTGTGGGTTG CACTTTCTGAGGTGGGTTATGAAAGTG AGA TGG
A9,87	TG AGA TGGAAGTATGTTTTG CCTTCTCGAAAGAGTTAAGAGAGAAGG AGA TGG
A10,88	TG AGA TGATGTGTGTGGTTG CTAACCAATGGATGTGGATATGGTTAG AGA TGG
A11,89	TG AGA TGGGTTGAATGTGTG CTTTCTAGGTGGGAATGAGATAGAAAG AGA TGG
A12,90	TG AGA TGAAGAGGTTAGATG CTTTCTCGTTTGGGAAGGTTGAGAAAG AGA TGG
A7,91	TG AGA TGGAAGGTAGTATTG CCTTTCAATGAAAGAGGAAATGAAAGG AGA TGG
A8,92	TG AGA TGGGTGTTGAGGATG CACTTTCTGAGGTGGGTTATGAAAGTG AGA TGG
A9,93	TG AGA TGTAGTGAGGGTGTG CCTTCTCGAAAGAGTTAAGAGAGAAGG AGA TGG
A10,94	TG AGA TGGAAATGTGAGGTG CTAACCAATGGATGTGGATATGGTTAG AGA TGG
A11,95	TG AGA TGGTAGTGATTGATG CTTTCTAGGTGGGAATGAGATAGAAAG AGA TGG
A14,98	TG AGA TGTTAGGTTAGGATG CTCTTACGAATAGGTAAAGTGTAAGAG AGA TGG
A15,99	TG AGA TGGGAAAGAAGAGTG CCATACATGTGAAGTTGGATTGTATGG AGA TGG
A17,101	TG AGA TGTAGTTGTGGAGTG CACTCTCAAATCATAAAACAGAGAGTG AGA TGG
A18,102	TG AGA TGATTGTGTAGTTTG CCACTCCCTACAACAAACTAGGAGTGG AGA TGG
A13,103	TG AGA TGGGATGGAAAGATG CAACTCTAAGGGTGGTAAAGAGAGTTG AGA TGG
A14,104	TG AGA TGTGTAGGATGGATG CTCTTACGAATAGGTAAAGTGTAAGAG AGA TGG
A15,105	TG AGA TGGTGGGAAGTTGTG CCATACATGTGAAGTTGGATTGTATGG AGA TGG
A17,107	TG AGA TGGTTGGTGGATTTG CACTCTC AAATCATAAAACA GAGAGTG AGA TGG
A20,110	TG AGA TGTATAGGGTGATTG CATTTCTTGTATGAGGAAGTAGAAATG AGA TGG
A23,113	TG AGA TGGGTGAAAGATTTG CCACCTTAGTAGAAGTTTGGAAGGTGG AGA TGG
A24,114	TG AGA TGTTGAATAGGATTG CATTTCTTAATGGAGTGATGAGAAATG AGA TGG
A19,115	TG AGA TGTGTAGAATGTTTG CATACATTAGTAGTTGGGATATGTATG AGA TGG
A20,116	TG AGA TGAGGAATAGTTTTG CATTTCTTGTATGAGGAAGTAGAAATG AGA TGG
A23,119	TG AGA TGGGAGAATGTAGTG CCACCTTAGTAGAAGTTTGGAAGGTGG AGA TGG
A27,123	TG AGA TGGATTGAGTGTGTG CTATCCATAACAACTCAACCTGGATAG AGA TGG
A28,124	TG AGA TGGGAGGGAGGTTTG CATTACAGAATTGTGGGAAATGTAATG AGA TGG
A30,126	TG AGA TGGAAGAGATGAATG CAATCCATTTGTATGAAGAGTGGATTG AGA TGG
A27,129	TG AGA TGAGAAGTTATGGTG CTATCCATAACAACTCAACCTGGATAG AGA TGG
A28,130	TG AGA TGTGATAGGTAGATG CATTACAGAATTGTGGGAAATGTAATG AGA TGG
P15,1	CACACCTCCCAATCA TCT CATTCCCACTAACCA TCT CA
P16,2	CACAAACCTACACCA TCT CAAACTTACTATCCA TCT CA
P17,2	CATTACTTATCCACA TCT CAAACTTACTATCCA TCT CA
P18,1	CAATCTCTCCAAACA TCT CATTCCCACTAACCA TCT CA
P19,4	CACACCAACAACTCA TCT CATATCCCACTTCCA TCT CA
P20,3	CAAACAACTTTTCCA TCT CAATCCACTTTCACA TCT CA
P21,3	CATAACATATCACCA TCT CAATCCACTTTCACA TCT CA
P26,1	CATTCACTATCTACA TCT CATTCCCACTAACCA TCT CA
P27,1	CAATCTACCAAAACA TCT CATTCCCACTAACCA TCT CA
P29,2	CACCATCAACTATCA TCT CAAACTTACTATCCA TCT CA
P30,2	CAACTATACAATCCA TCT CAAACTTACTATCCA TCT CA
P31,3	CACTTCAACACACCA TCT CAATCCACTTTCACA TCT CA
P32,3	CAACTCTCTACATCA TCT CAATCCACTTTCACA TCT CA
P33,3	CACATCATCATATCA TCT CAATCCACTTTCACA TCT CA
P38,1	CAATTCTCCTACCCA TCT CATTCCCACTAACCA TCT CA
P41,1	CACCTTACCAAACCA TCT CATTCCCACTAACCA TCT CA
P42,2	CACCTTCAAATCCCA TCT CAAACTTACTATCCA TCT CA
P43,3	CAATACCCACTCTCA TCT CAATCCACTTTCACA TCT CA
P44,3	CAACTCCTACTATCA TCT CAATCCACTTTCACA TCT CA
P47,3	CATCTTCCTCCCACA TCT CAATCCACTTTCACA TCT CA
P51,1	CACTTCTACAATTCA TCT CATTCCCACTAACCA TCT CA
P52,2	CAACCTTCTCCTCCA TCT CAAACTTACTATCCA TCT CA
P54,1	CACTCTCTTCAACCA TCT CATTCCCACTAACCA TCT CA
P57,3	CATCAAATCTACTCA TCT CAATCCACTTTCACA TCT CA
P58,4	CACTCCTAATCTTCA TCT CATATCCCACTTCCA TCT CA
P62,2	CAATCTTATCATCCA TCT CAAACTTACTATCCA TCT CA
P63,1	CAACCAACATAACCA TCT CATTCCCACTAACCA TCT CA
P65,1	CAACATACCAAATCA TCT CATTCCCACTAACCA TCT CA
P66,1	CATCCACACTCTTCA TCT CATTCCCACTAACCA TCT CA
P67,4	CAACCATACCACTCA TCT CATATCCCACTTCCA TCT CA
P68,4	CATTCTTCACTAACA TCT CATATCCCACTTCCA TCT CA
P69,3	CACACTAACTCTCCA TCT CAATCCACTTTCACA TCT CA
P71,3	CACCTTTACATTCCA TCT CAATCCACTTTCACA TCT CA
P74,6	CAACATTCCTCTACA TCT CAACAAACCACCTCA TCT CA
P75,5	CACCTCTACTACTCA TCT CACTTTCTATTCACA TCT CA
P76,6	CAACACTTTCCTACA TCT CAACAAACCACCTCA TCT CA
P78,5	CAATCCCATCCTTCA TCT CACTTTCTATTCACA TCT CA
P79,8	CATTTCCTATCCTCA TCT CACTTAACCCTTACA TCT CA
P80,8	CACTCTCATAATCCA TCT CACTTAACCCTTACA TCT CA
P81,7	CAATCATCTATTCCA TCT CATTCAATACAACCA TCT CA
P82,8	CACATCTTCTTCCCA TCT CACTTAACCCTTACA TCT CA
P86,5	CAACCCACAAAACCA TCT CACTTTCTATTCACA TCT CA
P87,5	CAAAACATACTTCCA TCT CACTTTCTATTCACA TCT CA
P88,6	CAACCACACACATCA TCT CAACAAACCACCTCA TCT CA
P89,6	CACACATTCAACCCA TCT CAACAAACCACCTCA TCT CA
P90,5	CATCTAACCTCTTCA TCT CACTTTCTATTCACA TCT CA
P91,8	CAATACTACCTTCCA TCT CACTTAACCCTTACA TCT CA
P92,7	CATCCTCAACACCCA TCT CATTCAATACAACCA TCT CA
P93,7	CACACCCTCACTACA TCT CATTCAATACAACCA TCT CA
P94,8	CACCTCACATTTCCA TCT CACTTAACCCTTACA TCT CA
P95,8	CATCAATCACTACCA TCT CACTTAACCCTTACA TCT CA
P98,5	CATCCTAACCTAACA TCT CACTTTCTATTCACA TCT CA
P99,5	CACTCTTCTTTCCCA TCT CACTTTCTATTCACA TCT CA
P101,6	CACTCCACAACTACA TCT CAACAAACCACCTCA TCT CA
P102,6	CAAACTACACAATCA TCT CAACAAACCACCTCA TCT CA
P103,7	CATCTTTCCATCCCA TCT CATTCAATACAACCA TCT CA
P104,7	CATCCATCCTACACA TCT CATTCAATACAACCA TCT CA
P105,7	CACAACTTCCCACCA TCT CATTCAATACAACCA TCT CA
P107,8	CAAATCCACCAACCA TCT CACTTAACCCTTACA TCT CA
P110,5	CAATCACCCTATACA TCT CACTTTCTATTCACA TCT CA
P113,5	CAAATCTTTCACCCA TCT CACTTTCTATTCACA TCT CA
P114,6	CAATCCTATTCAACA TCT CAACAAACCACCTCA TCT CA
P115,7	CAAACATTCTACACA TCT CATTCAATACAACCA TCT CA
P116,7	CAAAACTATTCCTCA TCT CATTCAATACAACCA TCT CA
P119,7	CACTACATTCTCCCA TCT CATTCAATACAACCA TCT CA
P123,5	CACACACTCAATCCA TCT CACTTTCTATTCACA TCT CA
P124,6	CAAACCTCCCTCCCA TCT CAACAAACCACCTCA TCT CA
P126,5	CATTCATCTCTTCCA TCT CACTTTCTATTCACA TCT CA
P129,7	CACCATAACTTCTCA TCT CATTCAATACAACCA TCT CA
P130,8	CATCTACCTATCACA TCT CACTTAACCCTTACA TCT CA
B1	CCACTGC CTACAACATCTAAACACACAGTTGTAG
B2	CCACTGC CTATCCTCTCAACTACCCTCAGGATAG
B3	CCACTGC CTTTTCTCACCTCCATCAATAGAAAAG
B4	CCACTGC CCTATCTTAACAATTCCCTCAGATAGG
B6	CCACTGC CCCAAACATTCACATATCCAGTTTGGG
B7	CCACTGC CCTTTCATTTCCTCTTTCATTGAAAGG
B8	CCACTGC CACTTTCATAACCCACCTCAGAAAGTG
B9	CCACTGC CCTTCTCTCTTAACTCTTTCAGAAGG
B10	CCACTGC CTAACCATATCCACATCCATTGGTTAG
B11	CCACTGC CTTTCTATCTCATTCCCACCTAGAAAG
B12	CCACTGC CTTTCTCAACCTTCCCAAACGAGAAAG
B13	CCACTGC CAACTCTCTTTACCACCCTTAGAGTTG
B14	CCACTGC CTCTTACACTTTACCTATTCGTAAGAG
B15	CCACTGC CCATACAATCCAACTTCACATGTATGG
B17	CCACTGC CACTCTCTGTTTTATGATTTGAGAGTG
B18	CCACTGC CCACTCCTAGTTTGTTGTAGGGAGTGG
B19	CCACTGC CATACATATCCCAACTACTAATGTATG
B20	CCACTGC CATTTCTACTTCCTCATACAAGAAATG
B23	CCACTGC CCACCTTCCAAACTTCTACTAAGGTGG
B24	CCACTGC CATTTCTCATCACTCCATTAAGAAATG
B27	CCACTGC CTATCCATAACAACTCAACCTGGATAG
B28	CCACTGC CATTACATTTCCCACAATTCTGTAATG
B30	CCACTGC CAATCCACTCTTCATACAAATGGATTG
B31	CCACTGC CCTAACCCTCCAACTCTACAGGTTAGG
B32	CCACTGC CTCTCTTCAACACACCAATAAAGAGAG
B33	CCACTGC CTATACACCACCAAACAATATGTATAG
B35	CCACTGC CAACAAATCAATCACCAATCTTTGTTG
B36	CCACTGC CTCCACTATTCTAATCACTCAGTGGAG
W1	CTACAACTGTGTGTTTAGATGTTGTAG GCAGTGG
W2	CTATCCTGAGGGTAGTTGAGAGGATAG GCAGTGG
W3	CTTTTCTATTGATGGAGGTGAGAAAAG GCAGTGG
W4	CCTATCTGAGGGAATTGTTAAGATAGG GCAGTGG
W6	CCCAAACTGGATATGTGAATGTTTGGG GCAGTGG
W7	CCTTTCAATGAAAGAGGAAATGAAAGG GCAGTGG
W8	CACTTTCTGAGGTGGGTTATGAAAGTG GCAGTGG
W9	CCTTCTCGAAAGAGTTAAGAGAGAAGG GCAGTGG
W10	CTAACCAATGGATGTGGATATGGTTAG GCAGTGG
W11	CTTTCTAGGTGGGAATGAGATAGAAAG GCAGTGG
W12	CTTTCTCGTTTGGGAAGGTTGAGAAAG GCAGTGG
W13	CAACTCTAAGGGTGGTAAAGAGAGTTG GCAGTGG
W14	CTCTTACGAATAGGTAAAGTGTAAGAG GCAGTGG
W15	CCATACATGTGAAGTTGGATTGTATGG GCAGTGG
W17	CACTCTCAAATCATAAAACAGAGAGTG GCAGTGG
W18	CCACTCCCTACAACAAACTAGGAGTGG GCAGTGG
W19	CATACATTAGTAGTTGGGATATGTATG GCAGTGG
W20	CATTTCTTGTATGAGGAAGTAGAAATG GCAGTGG
W23	CCACCTTAGTAGAAGTTTGGAAGGTGG GCAGTGG
W24	CATTTCTTAATGGAGTGATGAGAAATG GCAGTGG
W27	CTATCCAGGTTGAGTTGTTATGGATAG GCAGTGG
W28	CATTACAGAATTGTGGGAAATGTAATG GCAGTGG
W30	CAATCCATTTGTATGAAGAGTGGATTG GCAGTGG
W31	CCTAACCTGTAGAGTTGGAGGGTTAGG GCAGTGG
W32	CTCTCTTTATTGGTGTGTTGAAGAGAG GCAGTGG
W33	CTATACATATTGTTTGGTGGTGTATAG GCAGTGG
W35	CAACAAAGATTGGTGATTGATTTGTTG GCAGTGG
W36	CTCCACTGAGTGATTAGAATAGTGGAG GCAGTGG
Ss1,9	CATTCCCACTAACCA TCT CATCACTTCCTTTCA TCT TT CA
`Ss2,10	CAAACTTACTATCCA TCT CACCTATCTTTCTACTCTAC
Ss3,11	CAATCCACTTTCACA TCT CACTCCCAACCATCA TCT TT CA
`Ss4,12	CATATCCCACTTCCA TCT CATCTACTTACTCACCAAAC
Ss5,13	CACTTTCTATTCACA TCT CACCCTTTCCCTACA TCT TT CA
`Ss6,14	CAACAAACCACCTCA TCT CAATCAAACACAACACCTTC
Ss7,15	CATTCAATACAACCA TCT CAACATCAAAACCCA TCT TT CA
`Ss8,16	CACTTAACCCTTACA TCT CATACTCTATTCTCATCAAC
Ss1,9-1	TG AGA TGGTTAGTGGGAATG AGA TG
`Ss2,10*	TG AGA TGGATAGTAAGTTTG AGA TG
Ss3,11*	TG AGA TGTGAAAGTGGATTG AGA TG
`Ss4,12*	TG AGA TGGAAGTGGGATATG AGA TG
Ss5,13*	TG AGA TGTGAATAGAAAGTG AGA TG
`Ss6,14*	TG AGA TGAGGTGGTTTGTTG AGA TG
Ss7,15*	TG AGA TGGTTGTATTGAATG AGA TG
`Ss8,16*	TG AGA TGTAAGGGTTAAGTG AGA TG
Ds9,17	CATCACTTCCTTTCA TCT TT CAACTACCTCCTACA TCT TT CA
Ds11,18	CACTCCCAACCATCA TCT TT CACACTCCTTACTCA TCT TT CA
Ds13,19	CACCCTTTCCCTACA TCT TT CACCCATCCAATCCA TCT TT CA
Ds15,20	CAACATCAAAACCCA TCT TT CACCTAAACAACCCA TCT TT CA
Ds9,17*	TG AA AGA TGAAAGGAAGTGATG AGA TG
Ds11,18*	TG AA AGA TGATGGTTGGGAGTG AGA TG
Ds13,19*	TG AA AGATGTAGGGAAAGGGTG AGA TG
Ds15,20*	TG AA AGATGGGTTTTGATGTTG AGA TG
Sub10,17	TG AA AGA TGTAGGAGGTAGTTG GTAGAGTCACCTATCTTTCTACTCTAC AGA TG AA
Sub12,18	TG AA AGA TGAGTAAGGAGTGTG GTTTGGTCATCTACTTACTCACCAAAC AGA TG AT
Sub14,19	TG AA AGA TGGATTGGATGGGTG GAAGGTGCAATCAAACACAACACCTTC AGA TG TA
Sub16,20	TG AA AGA TGGGTTGTTTAGGTG GTTGATGCATACTCTATTCTCATCAAC AGA TG GG
In10	GTAGAGTAGAAAGATAGGTG AGA TG GA
In12	GTTTGGTGAGTAAGTAGATG AGA TG GA
In14	GAAGGTGTTGTGTTTGATTG AGA TG AG
In16	GTTGATGAGAATAGAGTATG AGA TG TA
C17	CAACTACCTCCTACA TCT TT CAAAAAAAAAAAAAA
C18	CACACTCCTTACTCA TCT TT CAAAAAAAAAAAAAA
C19	CACCCATCCAATCCA TCT TT CAAAAAAAAAAAAAA
C20	CACCTAAACAACCCA TCT TT CAAAAAAAAAAAAAA
G17,21	CAACTACCTCCTACA TCT TT CATCATTACTCATCA TCT CA
G18,22	CACACTCCTTACTCA TCT TT CAACCCTTCCCTCCA TCT CA
G19,23	CACCCATCCAATCCA TCT TT CACCCTCCCTTCTCA TCT CA
G20,24	CACCTAAACAACCCA TCT TT CAACCTAATCAACCA TCT CA
G17,21*	TG AA AGA TGTAGGAGGTAGTTG GTGATGACATCTACTCCCATTCATCAC AGA TG
G18,22*	TG AA AGA TGAGTAAGGAGTGTG GTAAGGAACTCTACATTATCTCCTTAC AGA TG
G19,23*	TG AA AGA TGGATTGGATGGGTG GTAAGGAACTCTACATTATCTCCTTAC AGA TG
G20,24*	TG AA AGA TGGGTTGTTTAGGTG GTAAGGAACTCTACATTATCTCCTTAC AGA TG
inh21,23	TTCACCCTCCCTTCTCA TCT CA TGAGATGATGAGTAATGATGAA AGATGTA
inh21,23*	TTCATCATTACTCATCA TCT CA TGAGATGAGAAGGGAGGGTGAA AGATGAG
inh22,24	TTCAACCTAATCAACCA TCT CA TGAGATGGAGGGAAGGGTTGAA AGATGGA
inh22,24*	TTCAACCCTTCCCTCCA TCT CA TGAGATGGTTGATTAGGTTGAA AGATGGG
Rep21	CATCATTACTCATCA TCT CA /FAM/
Rep22	CAACCCTTCCCTCCA TCT CA /ROX/
Rep23	CACCCTCCCTTCTCA TCT CA /FAM/
Rep24	CAACCTAATCAACCA TCT CA /ROX/
Rep21*	/BHQ-1/ TG AGA TGATGAGTAATGATG GTAGAGTCACCTATCTTTCTACTCTAC AGA TG
Rep22*	/BHQ-2/ TG AGA TGGAGGGAAGGGTTG GTTTGGTCATCTACTTACTCACCAAAC AGA TG
Rep23*	/BHQ-1/ TG AGA TGAGAAGGGAGGGTG GAAAGTTATAACCCACCTCAAACTTTC AGA TG
Rep24*	/BHQ-2/ TG AGA TGGTTGATTAGGTTG GTGATGACATCTACTCCCATTCATCAC AGA TG

## Sheet: eight patterns
strand name	sequence (from 5' to 3')
X15	AAAAAAAAAAAAAAA CCA TCT TT CACACCTCCCAATCA TCT CA
X17	AAAAAAAAAAAAAAA CCA TCT TT CATTACTTATCCACA TCT CA
X18	AAAAAAAAAAAAAAA CCA TCT TT CAATCTCTCCAAACA TCT CA
X19	AAAAAAAAAAAAAAA CCA TCT TT CACACCAACAACTCA TCT CA
X20	AAAAAAAAAAAAAAA CCA TCT TT CAAACAACTTTTCCA TCT CA
X21	AAAAAAAAAAAAAAA CCA TCT TT CATAACATATCACCA TCT CA
X22	AAAAAAAAAAAAAAA CCA TCT TT CACAAACCTACACCA TCT CA
X23	AAAAAAAAAAAAAAA CCA TCT TT CAATCACCCTATACA TCT CA
X26	AAAAAAAAAAAAAAA CCA TCT TT CATTCACTATCTACA TCT CA
X27	AAAAAAAAAAAAAAA CCA TCT TT CAATCTACCAAAACA TCT CA
X28	AAAAAAAAAAAAAAA CCA TCT TT CATTTCACAACACCA TCT CA
X29	AAAAAAAAAAAAAAA CCA TCT TT CACCATCAACTATCA TCT CA
X30	AAAAAAAAAAAAAAA CCA TCT TT CAACTATACAATCCA TCT CA
X31	AAAAAAAAAAAAAAA CCA TCT TT CACTTCAACACACCA TCT CA
X32	AAAAAAAAAAAAAAA CCA TCT TT CAACTCTCTACATCA TCT CA
X33	AAAAAAAAAAAAAAA CCA TCT TT CACATCATCATATCA TCT CA
X34	AAAAAAAAAAAAAAA CCA TCT TT CATATCATACTCCCA TCT CA
X38	AAAAAAAAAAAAAAA CCA TCT TT CAATTCTCCTACCCA TCT CA
X39	AAAAAAAAAAAAAAA CCA TCT TT CATTACACACCCACA TCT CA
X40	AAAAAAAAAAAAAAA CCA TCT TT CAATCAAACATCCCA TCT CA
X41	AAAAAAAAAAAAAAA CCA TCT TT CACCTTACCAAACCA TCT CA
X42	AAAAAAAAAAAAAAA CCA TCT TT CACCTTCAAATCCCA TCT CA
X43	AAAAAAAAAAAAAAA CCA TCT TT CAATACCCACTCTCA TCT CA
X44	AAAAAAAAAAAAAAA CCA TCT TT CAACTCCTACTATCA TCT CA
X45	AAAAAAAAAAAAAAA CCA TCT TT CACCTACTCTCCTCA TCT CA
X46	AAAAAAAAAAAAAAA CCA TCT TT CACATCCATACCTCA TCT CA
X47	AAAAAAAAAAAAAAA CCA TCT TT CATCTTCCTCCCACA TCT CA
X50	AAAAAAAAAAAAAAA CCA TCT TT CATCTCCTTCTACCA TCT CA
X51	AAAAAAAAAAAAAAA CCA TCT TT CACTTCTACAATTCA TCT CA
X52	AAAAAAAAAAAAAAA CCA TCT TT CAACCTTCTCCTCCA TCT CA
X53	AAAAAAAAAAAAAAA CCA TCT TT CAAACTCCTCTAACA TCT CA
X54	AAAAAAAAAAAAAAA CCA TCT TT CACTCTCTTCAACCA TCT CA
X55	AAAAAAAAAAAAAAA CCA TCT TT CATCCCATTTCAACA TCT CA
X56	AAAAAAAAAAAAAAA CCA TCT TT CATTTCTCATCACCA TCT CA
X57	AAAAAAAAAAAAAAA CCA TCT TT CATCAAATCTACTCA TCT CA
X58	AAAAAAAAAAAAAAA CCA TCT TT CACTCCTAATCTTCA TCT CA
X59	AAAAAAAAAAAAAAA CCA TCT TT CAACCTCTCCTATCA TCT CA
X62	AAAAAAAAAAAAAAA CCA TCT TT CAATCTTATCATCCA TCT CA
X63	AAAAAAAAAAAAAAA CCA TCT TT CAACCAACATAACCA TCT CA
X64	AAAAAAAAAAAAAAA CCA TCT TT CATAACCTTTCTTCA TCT CA
X65	AAAAAAAAAAAAAAA CCA TCT TT CAACATACCAAATCA TCT CA
X66	AAAAAAAAAAAAAAA CCA TCT TT CATCCACACTCTTCA TCT CA
X67	AAAAAAAAAAAAAAA CCA TCT TT CAACCATACCACTCA TCT CA
X68	AAAAAAAAAAAAAAA CCA TCT TT CATTCTTCACTAACA TCT CA
X69	AAAAAAAAAAAAAAA CCA TCT TT CACACTAACTCTCCA TCT CA
X70	AAAAAAAAAAAAAAA CCA TCT TT CACCACAACCTACCA TCT CA
X71	AAAAAAAAAAAAAAA CCA TCT TT CACCTTTACATTCCA TCT CA
X74	AAAAAAAAAAAAAAA CCA TCT TT CAACATTCCTCTACA TCT CA
X75	AAAAAAAAAAAAAAA CCA TCT TT CACCTCTACTACTCA TCT CA
X76	AAAAAAAAAAAAAAA CCA TCT TT CAACACTTTCCTACA TCT CA
X77	AAAAAAAAAAAAAAA CCA TCT TT CACACAATACCTCCA TCT CA
X78	AAAAAAAAAAAAAAA CCA TCT TT CAATCCCATCCTTCA TCT CA
X79	AAAAAAAAAAAAAAA CCA TCT TT CATTTCCTATCCTCA TCT CA
X80	AAAAAAAAAAAAAAA CCA TCT TT CACTCTCATAATCCA TCT CA
X81	AAAAAAAAAAAAAAA CCA TCT TT CAATCATCTATTCCA TCT CA
X82	AAAAAAAAAAAAAAA CCA TCT TT CACATCTTCTTCCCA TCT CA
X83	AAAAAAAAAAAAAAA CCA TCT TT CAATTCATCATCTCA TCT CA
X86	AAAAAAAAAAAAAAA CCA TCT TT CAACCCACAAAACCA TCT CA
X87	AAAAAAAAAAAAAAA CCA TCT TT CAAAACATACTTCCA TCT CA
X88	AAAAAAAAAAAAAAA CCA TCT TT CAACCACACACATCA TCT CA
X89	AAAAAAAAAAAAAAA CCA TCT TT CACACATTCAACCCA TCT CA
X90	AAAAAAAAAAAAAAA CCA TCT TT CATCTAACCTCTTCA TCT CA
X91	AAAAAAAAAAAAAAA CCA TCT TT CAATACTACCTTCCA TCT CA
X92	AAAAAAAAAAAAAAA CCA TCT TT CATCCTCAACACCCA TCT CA
X93	AAAAAAAAAAAAAAA CCA TCT TT CACACCCTCACTACA TCT CA
X94	AAAAAAAAAAAAAAA CCA TCT TT CACCTCACATTTCCA TCT CA
X95	AAAAAAAAAAAAAAA CCA TCT TT CATCAATCACTACCA TCT CA
X98	AAAAAAAAAAAAAAA CCA TCT TT CATCCTAACCTAACA TCT CA
X99	AAAAAAAAAAAAAAA CCA TCT TT CACTCTTCTTTCCCA TCT CA
X100	AAAAAAAAAAAAAAA CCA TCT TT CAAACACCTCATCCA TCT CA
X101	AAAAAAAAAAAAAAA CCA TCT TT CACTCCACAACTACA TCT CA
X102	AAAAAAAAAAAAAAA CCA TCT TT CAAACTACACAATCA TCT CA
X103	AAAAAAAAAAAAAAA CCA TCT TT CATCTTTCCATCCCA TCT CA
X104	AAAAAAAAAAAAAAA CCA TCT TT CATCCATCCTACACA TCT CA
X105	AAAAAAAAAAAAAAA CCA TCT TT CACAACTTCCCACCA TCT CA
X106	AAAAAAAAAAAAAAA CCA TCT TT CACCAATCATACCCA TCT CA
X107	AAAAAAAAAAAAAAA CCA TCT TT CAAATCCACCAACCA TCT CA
X111	AAAAAAAAAAAAAAA CCA TCT TT CACCCTCCCTTCTCA TCT CA
X112	AAAAAAAAAAAAAAA CCA TCT TT CATCACATACCTACA TCT CA
X113	AAAAAAAAAAAAAAA CCA TCT TT CAAATCTTTCACCCA TCT CA
X114	AAAAAAAAAAAAAAA CCA TCT TT CAATCCTATTCAACA TCT CA
X115	AAAAAAAAAAAAAAA CCA TCT TT CAAACATTCTACACA TCT CA
X116	AAAAAAAAAAAAAAA CCA TCT TT CAAAACTATTCCTCA TCT CA
X117	AAAAAAAAAAAAAAA CCA TCT TT CAACTAACCTTCACA TCT CA
X118	AAAAAAAAAAAAAAA CCA TCT TT CACCACTATACTCCA TCT CA
X122	AAAAAAAAAAAAAAA CCA TCT TT CACTACATTCTCCCA TCT CA
X123	AAAAAAAAAAAAAAA CCA TCT TT CACACACTCAATCCA TCT CA
X124	AAAAAAAAAAAAAAA CCA TCT TT CAAACCTCCCTCCCA TCT CA
X125	AAAAAAAAAAAAAAA CCA TCT TT CATCCAACTCTACCA TCT CA
X126	AAAAAAAAAAAAAAA CCA TCT TT CATTCATCTCTTCCA TCT CA
X127	AAAAAAAAAAAAAAA CCA TCT TT CACCTCCTTTACCCA TCT CA
X128	AAAAAAAAAAAAAAA CCA TCT TT CAACAATCTCATACA TCT CA
X129	AAAAAAAAAAAAAAA CCA TCT TT CACCATAACTTCTCA TCT CA
X130	AAAAAAAAAAAAAAA CCA TCT TT CATCTACCTATCACA TCT CA
A9,15	TG AGA TGATTGGGAGGTGTG CCTTCTCGAAAGAGTTAAGAGAGAAGG AGA TGG
A11,17	TG AGA TGTGGATAAGTAATG CTTTCTAGGTGGGAATGAGATAGAAAG AGA TGG
A12,18	TG AGA TGTTTGGAGAGATTG CTTTCTCGTTTGGGAAGGTTGAGAAAG AGA TGG
A7,19	TG AGA TGAGTTGTTGGTGTG CCTTTCAATGAAAGAGGAAATGAAAGG AGA TGG
A8,20	TG AGA TGGAAAAGTTGTTTG CACTTTCTGAGGTGGGTTATGAAAGTG AGA TGG
A9,21	TG AGA TGGTGATATGTTATG CCTTCTCGAAAGAGTTAAGAGAGAAGG AGA TGG
A10,22	TG AGA TGGTGTAGGTTTGTG CTAACCAATGGATGTGGATATGGTTAG AGA TGG
A11,23	TG AGA TGTATAGGGTGATTG CTTTCTAGGTGGGAATGAGATAGAAAG AGA TGG
A14,26	TG AGA TGTAGATAGTGAATG CTCTTACGAATAGGTAAAGTGTAAGAG AGA TGG
A15,27	TG AGA TGTTTTGGTAGATTG CCATACATGTGAAGTTGGATTGTATGG AGA TGG
A16,28	TG AGA TGGTGTTGTGAAATG CACCAATAGGAATGATGTGAATTGGTG AGA TGG
A17,29	TG AGA TGATAGTTGATGGTG CACTCTCAAATCATAAAACAGAGAGTG AGA TGG
A18,30	TG AGA TGGATTGTATAGTTG CCACTCCCTACAACAAACTAGGAGTGG AGA TGG
A13,31	TG AGA TGGTGTGTTGAAGTG CAACTCTAAGGGTGGTAAAGAGAGTTG AGA TGG
A14,32	TG AGA TGATGTAGAGAGTTG CTCTTACGAATAGGTAAAGTGTAAGAG AGA TGG
A15,33	TG AGA TGATATGATGATGTG CCATACATGTGAAGTTGGATTGTATGG AGA TGG
A16,34	TG AGA TGGGAGTATGATATG CACCAATAGGAATGATGTGAATTGGTG AGA TGG
A2,38	TG AGA TGGGTAGGAGAATTG CTATCCTGAGGGTAGTTGAGAGGATAG AGA TGG
A3,39	TG AGA TGTGGGTGTGTAATG CTTTTCTATTGATGGAGGTGAGAAAAG AGA TGG
A4,40	TG AGA TGGGATGTTTGATTG CCTATCTGAGGGAATTGTTAAGATAGG AGA TGG
A5,41	TG AGA TGGTTTGGTAAGGTG CACTCACTGTATGGAGTTATGTGAGTG AGA TGG
A6,42	TG AGA TGGGATTTGAAGGTG CCCAAACTGGATTTGTGAATGTTTGGG AGA TGG
A1,43	TG AGA TGAGAGTGGGTATTG CTACAACTGTGTGTTTAGATGTTGTAG AGA TGG
A2,44	TG AGA TGATAGTAGGAGTTG CTATCCTGAGGGTAGTTGAGAGGATAG AGA TGG
A3,45	TG AGA TGAGGAGAGTAGGTG CTTTTCTATTGATGGAGGTGAGAAAAG AGA TGG
A4,46	TG AGA TGAGGTATGGATGTG CCTATCTGAGGGAATTGTTAAGATAGG AGA TGG
A5,47	TG AGA TGTGGGAGGAAGATG CACTCACTGTATGGAGTTATGTGAGTG AGA TGG
A8,50	TG AGA TGGTAGAAGGAGATG CACTTTCTGAGGTGGGTTATGAAAGTG AGA TGG
A9,51	TG AGA TGAATTGTAGAAGTG CCTTCTCGAAAGAGTTAAGAGAGAAGG AGA TGG
A10,52	TG AGA TGGAGGAGAAGGTTG CTAACCAATGGATGTGGATATGGTTAG AGA TGG
A11,53	TG AGA TGTTAGAGGAGTTTG CTTTCTAGGTGGGAATGAGATAGAAAG AGA TGG
A12,54	TG AGA TGGTTGAAGAGAGTG CTTTCTCGTTTGGGAAGGTTGAGAAAG AGA TGG
A7,55	TG AGA TGTTGAAATGGGATG CCTTTCAATGAAAGAGGAAATGAAAGG AGA TGG
A8,56	TG AGA TGGTGATGAGAAATG CACTTTCTGAGGTGGGTTATGAAAGTG AGA TGG
A9,57	TG AGA TGAGTAGATTTGATG CCTTCTCGAAAGAGTTAAGAGAGAAGG AGA TGG
A10,58	TG AGA TGAAGATTAGGAGTG CTAACCAATGGATGTGGATATGGTTAG AGA TGG
A11,59	TG AGA TGATAGGAGAGGTTG CTTTCTAGGTGGGAATGAGATAGAAAG AGA TGG
A14,62	TG AGA TGGATGATAAGATTG CTCTTACGAATAGGTAAAGTGTAAGAG AGA TGG
A15,63	TG AGA TGGTTATGTTGGTTG CCATACATGTGAAGTTGGATTGTATGG AGA TGG
A16,64	TG AGA TGAAGAAAGGTTATG CACCAATAGGAATGATGTGAATTGGTG AGA TGG
A17,65	TG AGA TGATTTGGTATGTTG CACTCTCAAATCATAAAACAGAGAGTG AGA TGG
A18,66	TG AGA TGAAGAGTGTGGATG CCACTCCCTACAACAAACTAGGAGTGG AGA TGG
A13,67	TG AGA TGAGTGGTATGGTTG CAACTCTAAGGGTGGTAAAGAGAGTTG AGA TGG
A14,68	TG AGA TGTTAGTGAAGAATG CTCTTACGAATAGGTAAAGTGTAAGAG AGA TGG
A15,69	TG AGA TGGAGAGTTAGTGTG CCATACATGTGAAGTTGGATTGTATGG AGA TGG
A16,70	TG AGA TGGTAGGTTGTGGTG CACCAATAGGAATGATGTGAATTGGTG AGA TGG
A17,71	TG AGA TGGAATGTAAAGGTG CACTCTCAAATCATAAAACAGAGAGTG AGA TGG
A2,74	TG AGA TGTAGAGGAATGTTG CTATCCTGAGGGTAGTTGAGAGGATAG AGA TGG
A3,75	TG AGA TGAGTAGTAGAGGTG CTTTTCTATTGATGGAGGTGAGAAAAG AGA TGG
A4,76	TG AGA TGTAGGAAAGTGTTG CCTATCTGAGGGAATTGTTAAGATAGG AGA TGG
A5,77	TG AGA TGGAGGTATTGTGTG CACTCACTGTATGGAGTTATGTGAGTG AGA TGG
A6,78	TG AGA TGAAGGATGGGATTG CCCAAACTGGATTTGTGAATGTTTGGG AGA TGG
A1,79	TG AGA TGAGGATAGGAAATG CTACAACTGTGTGTTTAGATGTTGTAG AGA TGG
A2,80	TG AGA TGGATTATGAGAGTG CTATCCTGAGGGTAGTTGAGAGGATAG AGA TGG
A3,81	TG AGA TGGAATAGATGATTG CTTTTCTATTGATGGAGGTGAGAAAAG AGA TGG
A4,82	TG AGA TGGGAAGAAGATGTG CCTATCTGAGGGAATTGTTAAGATAGG AGA TGG
A5,83	TG AGA TGAGATGATGAATTG CACTCACTGTATGGAGTTATGTGAGTG AGA TGG
A8,86	TG AGA TGGTTTTGTGGGTTG CACTTTCTGAGGTGGGTTATGAAAGTG AGA TGG
A9,87	TG AGA TGGAAGTATGTTTTG CCTTCTCGAAAGAGTTAAGAGAGAAGG AGA TGG
A10,88	TG AGA TGATGTGTGTGGTTG CTAACCAATGGATGTGGATATGGTTAG AGA TGG
A11,89	TG AGA TGGGTTGAATGTGTG CTTTCTAGGTGGGAATGAGATAGAAAG AGA TGG
A12,90	TG AGA TGAAGAGGTTAGATG CTTTCTCGTTTGGGAAGGTTGAGAAAG AGA TGG
A7,91	TG AGA TGGAAGGTAGTATTG CCTTTCAATGAAAGAGGAAATGAAAGG AGA TGG
A8,92	TG AGA TGGGTGTTGAGGATG CACTTTCTGAGGTGGGTTATGAAAGTG AGA TGG
A9,93	TG AGA TGTAGTGAGGGTGTG CCTTCTCGAAAGAGTTAAGAGAGAAGG AGA TGG
A10,94	TG AGA TGGAAATGTGAGGTG CTAACCAATGGATGTGGATATGGTTAG AGA TGG
A11,95	TG AGA TGGTAGTGATTGATG CTTTCTAGGTGGGAATGAGATAGAAAG AGA TGG
A14,98	TG AGA TGTTAGGTTAGGATG CTCTTACGAATAGGTAAAGTGTAAGAG AGA TGG
A15,99	TG AGA TGGGAAAGAAGAGTG CCATACATGTGAAGTTGGATTGTATGG AGA TGG
A16,100	TG AGA TGGATGAGGTGTTTG CACCAATAGGAATGATGTGAATTGGTG AGA TGG
A17,101	TG AGA TGTAGTTGTGGAGTG CACTCTCAAATCATAAAACAGAGAGTG AGA TGG
A18,102	TG AGA TGATTGTGTAGTTTG CCACTCCCTACAACAAACTAGGAGTGG AGA TGG
A13,103	TG AGA TGGGATGGAAAGATG CAACTCTAAGGGTGGTAAAGAGAGTTG AGA TGG
A14,104	TG AGA TGTGTAGGATGGATG CTCTTACGAATAGGTAAAGTGTAAGAG AGA TGG
A15,105	TG AGA TGGTGGGAAGTTGTG CCATACATGTGAAGTTGGATTGTATGG AGA TGG
A16,106	TG AGA TGGGTATGATTGGTG CACCAATAGGAATGATGTGAATTGGTG AGA TGG
A17,107	TG AGA TGGTTGGTGGATTTG CACTCTCAAATCATAAAACAGAGAGTG AGA TGG
A3,111	TG AGA TGAGAAGGGAGGGTG CTTTTCTATTGATGGAGGTGAGAAAAG AGA TGG
A4,112	TG AGA TGTAGGTATGTGATG CCTATCTGAGGGAATTGTTAAGATAGG AGA TGG
A5,113	TG AGA TGGGTGAAAGATTTG CACTCACTGTATGGAGTTATGTGAGTG AGA TGG
A6,114	TG AGA TGTTGAATAGGATTG CCCAAACTGGATTTGTGAATGTTTGGG AGA TGG
A1,115	TG AGA TGTGTAGAATGTTTG CTACAACTGTGTGTTTAGATGTTGTAG AGA TGG
A2,116	TG AGA TGAGGAATAGTTTTG CTATCCTGAGGGTAGTTGAGAGGATAG AGA TGG
A3,117	TG AGA TGTGAAGGTTAGTTG CTTTTCTATTGATGGAGGTGAGAAAAG AGA TGG
A4,118	TG AGA TGGAGTATAGTGGTG CCTATCTGAGGGAATTGTTAAGATAGG AGA TGG
A8,122	TG AGA TGGGAGAATGTAGTG CACTTTCTGAGGTGGGTTATGAAAGTG AGA TGG
A9,123	TG AGA TGGATTGAGTGTGTG CCTTCTCGAAAGAGTTAAGAGAGAAGG AGA TGG
A10,124	TG AGA TGGGAGGGAGGTTTG CTAACCAATGGATGTGGATATGGTTAG AGA TGG
A11,125	TG AGA TGGTAGAGTTGGATG CTTTCTAGGTGGGAATGAGATAGAAAG AGA TGG
A12,126	TG AGA TGGAAGAGATGAATG CTTTCTCGTTTGGGAAGGTTGAGAAAG AGA TGG
A7,127	TG AGA TGGGTAAAGGAGGTG CCTTTCAATGAAAGAGGAAATGAAAGG AGA TGG
A8,128	TG AGA TGTATGAGATTGTTG CACTTTCTGAGGTGGGTTATGAAAGTG AGA TGG
A9,129	TG AGA TGAGAAGTTATGGTG CCTTCTCGAAAGAGTTAAGAGAGAAGG AGA TGG
A10,130	TG AGA TGTGATAGGTAGATG CTAACCAATGGATGTGGATATGGTTAG AGA TGG
P15,1	CACACCTCCCAATCA TCT CATTCCCACTAACCA TCT CA
P17,2	CATTACTTATCCACA TCT CAAACTTACTATCCA TCT CA
P18,1	CAATCTCTCCAAACA TCT CATTCCCACTAACCA TCT CA
P19,3	CACACCAACAACTCA TCT CAATCCACTTTCACA TCT CA
P20,3	CAAACAACTTTTCCA TCT CAATCCACTTTCACA TCT CA
P21,3	CATAACATATCACCA TCT CAATCCACTTTCACA TCT CA
P22,3	CACAAACCTACACCA TCT CAATCCACTTTCACA TCT CA
P23,4	CAATCACCCTATACA TCT CATATCCCACTTCCA TCT CA
P26,1	CATTCACTATCTACA TCT CATTCCCACTAACCA TCT CA
P27,2	CAATCTACCAAAACA TCT CAAACTTACTATCCA TCT CA
P28,2	CATTTCACAACACCA TCT CAAACTTACTATCCA TCT CA
P29,2	CACCATCAACTATCA TCT CAAACTTACTATCCA TCT CA
P30,2	CAACTATACAATCCA TCT CAAACTTACTATCCA TCT CA
P31,3	CACTTCAACACACCA TCT CAATCCACTTTCACA TCT CA
P32,3	CAACTCTCTACATCA TCT CAATCCACTTTCACA TCT CA
P33,4	CACATCATCATATCA TCT CATATCCCACTTCCA TCT CA
P34,4	CATATCATACTCCCA TCT CATATCCCACTTCCA TCT CA
P38,5	CAATTCTCCTACCCA TCT CATACACCCTTAACA TCT CA
P39,6	CATTACACACCCACA TCT CACTTACCTAACCCA TCT CA
P40,6	CAATCAAACATCCCA TCT CACTTACCTAACCCA TCT CA
P41,6	CACCTTACCAAACCA TCT CACTTACCTAACCCA TCT CA
P42,6	CACCTTCAAATCCCA TCT CATACACCCTTAACA TCT CA
P43,7	CAATACCCACTCTCA TCT CATACCCTTATCCCA TCT CA
P44,7	CAACTCCTACTATCA TCT CATACCCTTATCCCA TCT CA
P45,8	CACCTACTCTCCTCA TCT CATCTCTACCCTTCA TCT CA
P46,8	CACATCCATACCTCA TCT CATCTCTACCCTTCA TCT CA
P47,8	CATCTTCCTCCCACA TCT CATCTCTACCCTTCA TCT CA
P50,5	CATCTCCTTCTACCA TCT CATACACCCTTAACA TCT CA
P51,5	CACTTCTACAATTCA TCT CATACACCCTTAACA TCT CA
P52,5	CAACCTTCTCCTCCA TCT CATACACCCTTAACA TCT CA
P53,6	CAAACTCCTCTAACA TCT CACTTACCTAACCCA TCT CA
P54,5	CACTCTCTTCAACCA TCT CATACACCCTTAACA TCT CA
P55,7	CATCCCATTTCAACA TCT CATACCCTTATCCCA TCT CA
P56,7	CATTTCTCATCACCA TCT CATACCCTTATCCCA TCT CA
P57,7	CATCAAATCTACTCA TCT CATACCCTTATCCCA TCT CA
P58,7	CACTCCTAATCTTCA TCT CATACCCTTATCCCA TCT CA
P59,8	CAACCTCTCCTATCA TCT CATCTCTACCCTTCA TCT CA
P62,5	CAATCTTATCATCCA TCT CATACACCCTTAACA TCT CA
P63,6	CAACCAACATAACCA TCT CACTTACCTAACCCA TCT CA
P64,6	CATAACCTTTCTTCA TCT CACTTACCTAACCCA TCT CA
P65,6	CAACATACCAAATCA TCT CACTTACCTAACCCA TCT CA
P66,6	CATCCACACTCTTCA TCT CACTTACCTAACCCA TCT CA
P67,7	CAACCATACCACTCA TCT CATACCCTTATCCCA TCT CA
P68,7	CATTCTTCACTAACA TCT CATACCCTTATCCCA TCT CA
P69,8	CACACTAACTCTCCA TCT CATCTCTACCCTTCA TCT CA
P70,8	CACCACAACCTACCA TCT CATCTCTACCCTTCA TCT CA
P71,8	CACCTTTACATTCCA TCT CATCTCTACCCTTCA TCT CA
P74,9	CAACATTCCTCTACA TCT CACTTTCTATTCACA TCT CA
P75,10	CACCTCTACTACTCA TCT CAACAAACCACCTCA TCT CA
P76,10	CAACACTTTCCTACA TCT CAACAAACCACCTCA TCT CA
P77,10	CACACAATACCTCCA TCT CAACAAACCACCTCA TCT CA
P78,9	CAATCCCATCCTTCA TCT CACTTTCTATTCACA TCT CA
P79,11	CATTTCCTATCCTCA TCT CATTCAATACAACCA TCT CA
P80,11	CACTCTCATAATCCA TCT CATTCAATACAACCA TCT CA
P81,12	CAATCATCTATTCCA TCT CACTTAACCCTTACA TCT CA
P82,12	CACATCTTCTTCCCA TCT CACTTAACCCTTACA TCT CA
P83,12	CAATTCATCATCTCA TCT CACTTAACCCTTACA TCT CA
P86,9	CAACCCACAAAACCA TCT CACTTTCTATTCACA TCT CA
P87,9	CAAAACATACTTCCA TCT CACTTTCTATTCACA TCT CA
P88,9	CAACCACACACATCA TCT CACTTTCTATTCACA TCT CA
P89,10	CACACATTCAACCCA TCT CAACAAACCACCTCA TCT CA
P90,9	CATCTAACCTCTTCA TCT CACTTTCTATTCACA TCT CA
P91,11	CAATACTACCTTCCA TCT CATTCAATACAACCA TCT CA
P92,11	CATCCTCAACACCCA TCT CATTCAATACAACCA TCT CA
P93,11	CACACCCTCACTACA TCT CATTCAATACAACCA TCT CA
P94,11	CACCTCACATTTCCA TCT CATTCAATACAACCA TCT CA
P95,12	CATCAATCACTACCA TCT CACTTAACCCTTACA TCT CA
P98,9	CATCCTAACCTAACA TCT CACTTTCTATTCACA TCT CA
P99,10	CACTCTTCTTTCCCA TCT CACTTTCTATTCACA TCT CA
P100,10	CAAACACCTCATCCA TCT CAACAAACCACCTCA TCT CA
P101,10	CACTCCACAACTACA TCT CAACAAACCACCTCA TCT CA
P102,10	CAAACTACACAATCA TCT CAACAAACCACCTCA TCT CA
P103,11	CATCTTTCCATCCCA TCT CATTCAATACAACCA TCT CA
P104,11	CATCCATCCTACACA TCT CATTCAATACAACCA TCT CA
P105,12	CACAACTTCCCACCA TCT CACTTAACCCTTACA TCT CA
P106,12	CACCAATCATACCCA TCT CACTTAACCCTTACA TCT CA
P107,12	CAAATCCACCAACCA TCT CACTTAACCCTTACA TCT CA
P111,14	CACCCTCCCTTCTCA TCT CATACCTTTCCACCA TCT CA
P112,14	CATCACATACCTACA TCT CATACCTTTCCACCA TCT CA
P113,14	CAAATCTTTCACCCA TCT CATACCTTTCCACCA TCT CA
P114,13	CAATCCTATTCAACA TCT CATTACCAACTTACA TCT CA
P115,15	CAAACATTCTACACA TCT CATACTATACCTTCA TCT CA
P116,15	CAAAACTATTCCTCA TCT CATACTATACCTTCA TCT CA
P117,16	CAACTAACCTTCACA TCT CATCCCTACTTTTCA TCT CA
P118,16	CACCACTATACTCCA TCT CATCCCTACTTTTCA TCT CA
P122,13	CACTACATTCTCCCA TCT CATTACCAACTTACA TCT CA
P123,13	CACACACTCAATCCA TCT CATTACCAACTTACA TCT CA
P124,13	CAAACCTCCCTCCCA TCT CATTACCAACTTACA TCT CA
P125,14	CATCCAACTCTACCA TCT CATACCTTTCCACCA TCT CA
P126,13	CATTCATCTCTTCCA TCT CATTACCAACTTACA TCT CA
P127,15	CACCTCCTTTACCCA TCT CATACTATACCTTCA TCT CA
P128,15	CAACAATCTCATACA TCT CATACTATACCTTCA TCT CA
P129,15	CACCATAACTTCTCA TCT CATACTATACCTTCA TCT CA
P130,15	CATCTACCTATCACA TCT CATACTATACCTTCA TCT CA
B1	CCACTGC CTACAACATCTAAACACACAGTTGTAG
B2	CCACTGC CTATCCTCTCAACTACCCTCAGGATAG
B3	CCACTGC CTTTTCTCACCTCCATCAATAGAAAAG
B4	CCACTGC CCTATCTTAACAATTCCCTCAGATAGG
B5	CCACTGC CACTCACATAACTCCATACAGTGAGTG
B6	CCACTGC CCCAAACATTCACATATCCAGTTTGGG
B7	CCACTGC CCTTTCATTTCCTCTTTCATTGAAAGG
B8	CCACTGC CACTTTCATAACCCACCTCAGAAAGTG
B9	CCACTGC CCTTCTCTCTTAACTCTTTCGAGAAGG
B10	CCACTGC CTAACCATATCCACATCCATTGGTTAG
B11	CCACTGC CTTTCTATCTCATTCCCACCTAGAAAG
B12	CCACTGC CTTTCTCAACCTTCCCAAACGAGAAAG
B13	CCACTGC CAACTCTCTTTACCACCCTTAGAGTTG
B14	CCACTGC CTCTTACACTTTACCTATTCGTAAGAG
B15	CCACTGC CCATACAATCCAACTTCACATGTATGG
B16	CCACTGC CACCAATTCACATCATTCCTATTGGTG
B17	CCACTGC CACTCTCTGTTTTATGATTTGAGAGTG
B18	CCACTGC CCACTCCTAGTTTGTTGTAGGGAGTGG
W1	CTACAACTGTGTGTTTAGATGTTGTAG GCAGTGG
W2	CTATCCTGAGGGTAGTTGAGAGGATAG GCAGTGG
W3	CTTTTCTATTGATGGAGGTGAGAAAAG GCAGTGG
W4	CCTATCTGAGGGAATTGTTAAGATAGG GCAGTGG
W5	CACTCACTGTATGGAGTTATGTGAGTG GCAGTGG
W6	CCCAAACTGGATATGTGAATGTTTGGG GCAGTGG
W7	CCTTTCAATGAAAGAGGAAATGAAAGG GCAGTGG
W8	CACTTTCTGAGGTGGGTTATGAAAGTG GCAGTGG
W9	CCTTCTCGAAAGAGTTAAGAGAGAAGG GCAGTGG
W10	CTAACCAATGGATGTGGATATGGTTAG GCAGTGG
W11	CTTTCTAGGTGGGAATGAGATAGAAAG GCAGTGG
W12	CTTTCTCGTTTGGGAAGGTTGAGAAAG GCAGTGG
W13	CAACTCTAAGGGTGGTAAAGAGAGTTG GCAGTGG
W14	CTCTTACGAATAGGTAAAGTGTAAGAG GCAGTGG
W15	CCATACATGTGAAGTTGGATTGTATGG GCAGTGG
W16	CACCAATAGGAATGATGTGAATTGGTG GCAGTGG
W17	CACTCTCAAATCATAAAACAGAGAGTG GCAGTGG
W18	CCACTCCCTACAACAAACTAGGAGTGG GCAGTGG
Ss1,17	CATTCCCACTAACCA TCT CATCACTTCCTTTCA TCT TT CA
`Ss2,18	CAAACTTACTATCCA TCT CACCTATCTTTCTACTCTAC
S3,19	CAATCCACTTTCACA TCT CACTCCCAACCATCA TCT TT CA
`Ss4,20	CATATCCCACTTCCA TCT CATCTACTTACTCACCAAAC
S5,21	CATACACCCTTAACA TCT CACCATTCTAACTCA TCT TT CA
`Ss6,22	CACTTACCTAACCCA TCT CATCTACTCCCATTCATCAC
S7,23	CATACCCTTATCCCA TCT CATATCTCCCACCCA TCT TT CA
`Ss8,24	CATCTCTACCCTTCA TCT ACTCTACATTATCTCCTTAC
S9,25	CACTTTCTATTCACA TCT CACCCTTTCCCTACA TCT TT CA
`Ss10,26	CAACAAACCACCTCA TCT CAATCAAACACAACACCTTC
S11,27	CATTCAATACAACCA TCT CAACATCAAAACCCA TCT TT CA
`Ss12,28	CACTTAACCCTTACA TCT CATACTCTATTCTCATCAAC
S13,29	CATTACCAACTTACA TCT CACTAAACTACTCCA TCT TT CA
`Ss14,30	CATACCTTTCCACCA TCT CAACTTCAATTCCCAACTAC
S15,31	CATACTATACCTTCA TCT CACAATTCCTCCACA TCT TT CA
`Ss16,32	CATCCCTACTTTTCA TCT AACTTCTATCTAACCTCATC
Ss1,17*	TG AGA TGGTTAGTGGGAATG AGA TG
`Ss2,18*	TG AGA TGGATAGTAAGTTTG AGA TG
S3,19*	TG AGA TGTGAAAGTGGATTG AGA TG
`Ss4,20*	TG AGA TGGAAGTGGGATATG AGA TG
S5,21*	TG AGA TGTTAAGGGTGTATG AGA TG
`Ss6,22*	TG AGA TGGGTTAGGTAAGTG AGA TG
S7,23*	TG AGA TGGGATAAGGGTATG AGA TG
`Ss8,24*	TG AGA TGAAGGGTAGAGATG AGA TG
S9,25*	TG AGA TGTGAATAGAAAGTG AGA TG
`Ss10,26*	TG AGA TGAGGTGGTTTGTTG AGA TG
S11,27*	TG AGA TGGTTGTATTGAATG AGA TG
`Ss12,28*	TG AGA TGTAAGGGTTAAGTG AGA TG
S13,29*	TG AGA TGTAAGTTGGTAATG AGA TG
`Ss14,30*	TG AGA TGGTGGAAAGGTATG AGA TG
S15,31*	TG AGA TGAAGGTATAGTATG AGA TG
`Ss16,32*	TG AGA TGAAAAGTAGGGATG AGA TG
Ds17,33	CATCACTTCCTTTCA TCT TT CATCATTACTCATCA TCT CA
Ds19,34	CACTCCCAACCATCA TCT TT CAACCCTTCCCTCCA TCT CA
Ds21,35	CACCATTCTAACTCA TCT TT CAACTACCTCCTACA TCT CA
Ds23,36	CATATCTCCCACCCA TCT TT CACACTCCTTACTCA TCT CA
Ds25,37	CACCCTTTCCCTACA TCT TT CACCCTCCCTTCTCA TCT CA
Ds27,38	CAACATCAAAACCCA TCT TT CAACCTAATCAACCA TCT CA
Ds29,39	CACTAAACTACTCCA TCT TT CACCCATCCAATCCA TCT CA
Ds31,40	CACAATTCCTCCACA TCT TT CACCTAAACAACCCA TCT CA
Ds17,33*	TG AA AGA TGAAAGGAAGTGATG AGA TG
Ds19,34*	TG AA AGA TGATGGTTGGGAGTG AGA TG
Ds21,35*	TG AA AGA TGAGTTAGAATGGTG AGA TG
Ds23,36*	TG AA AGA TGGGTGGGAGATATG AGA TG
Ds25,37*	TG AA AGA TGTAGGGAAAGGGTG AGA TG
Ds27,38*	TG AA AGA TGGGTTTTGATGTTG AGA TG
Ds29,39*	TG AA AGA TGGAGTAGTTTAGTG AGA TG
Ds31,40*	TG AA AGA TGTGGAGGAATTGTG AGA TG
Sub18,33	TG AGA TGATGAGTAATGATG GTAGAGTCACCTATCTTTCTACTCTAC AGA TG AA
Sub20,34	TG AGA TGGAGGGAAGGGTTG GTTTGGTCATCTACTTACTCACCAAAC AGA TG AT
Sub22,35	TG AGA TGTAGGAGGTAGTTG GTGATGACATCTACTCCCATTCATCAC AGA TG AG
Sub24,36	TG AGA TGAGTAAGGAGTGTG GTAAGGAACTCTACATTATCTCCTTAC AGA TG GG
Sub26,37	TG AGA TGAGAAGGGAGGGTG GAAGGTGCAATCAAACACAACACCTTC AGA TG TA
Sub28,38	TG AGA TGGTTGATTAGGTTG GTTGATGCATACTCTATTCTCATCAAC AGA TG GG
Sub30,39	TG AGA TGGATTGGATGGGTG GTAGTTGCAACTTCAATTCCCAACTAC AGA TG GA
Sub32,40	TG AGA TGGGTTGTTTAGGTG GATGAGGAACTTCTATCTAACCTCATC AGA TG TG
In18	GTAGAGTAGAAAGATAGGTG AGA TG GA
In20	GTTTGGTGAGTAAGTAGATG AGA TG GA
In22	GTGATGAATGGGAGTAGATG AGA TG GG
In24	GTAAGGAGATAATGTAGAGT AGA TG AA
In26	GAAGGTGTTGTGTTTGATTG AGA TG AG
In28	GTTGATGAGAATAGAGTATG AGA TG TA
In30	GTAGTTGGGAATT GAAGTTG AGA TG GT
In32	GATGAGGTTAGATAGAAGTT AGA TG AA
C33	CATCATTACTCATCA TCT CAAAAAAAAAAAAAA
C34	CAACCCTTCCCTCCA TCT CAAAAAAAAAAAAAA
C35	CAACTACCTCCTACA TCT CAAAAAAAAAAAAAA
C36	CACACTCCTTACTCA TCT CAAAAAAAAAAAAAA
C37	CACCCTCCCTTCTCA TCT CAAAAAAAAAAAAAA
C38	CAACCTAATCAACCA TCT CAAAAAAAAAAAAAA
C39	CACCCATCCAATCCA TCT CAAAAAAAAAAAAAA
C40	CACCTAAACAACCCA TCT CAAAAAAAAAAAAAA
Rep1	CATCATTACTCATCA TCT CA /FAM/
Rep2	CAACCCTTCCCTCCA TCT CA /ROX/
Rep3	CAACTACCTCCTACA TCT CA /HEX/
Rep4	CACACTCCTTACTCA TCT CA /BHQ-3/
Rep5	CACCCTCCCTTCTCA TCT CA /FAM/
Rep6	CAACCTAATCAACCA TCT CA /ROX/
Rep7	CACCCATCCAATCCA TCT CA /HEX/
Rep8	CACCTAAACAACCCA TCT CA /BHQ-3/
Rep1*	/BHQ-1/ TG AGA TGATGAGTAATGATG GTAGAGTCACCTATCTTTCTACTCTAC AGA TG
Rep2*	/BHQ-2/ TG AGA TGGAGGGAAGGGTTG GTTTGGTCATCTACTTACTCACCAAAC AGA TG
Rep3*	/BHQ-1/ TG AGA TGTAGGAGGTAGTTG GTGATGACATCTACTCCCATTCATCAC AGA TG
Rep4*	/Cy5.5/ TG AGA TGAGTAAGGAGTGTG GTAAGGAACTCTACATTATCTCCTTAC AGA TG
Rep5*	/BHQ-1/ TG AGA TGAGAAGGGAGGGTG GAAAGTTATAACCCACCTCAAACTTTC AGA TG
Rep6*	/BHQ-2/ TG AGA TGGTTGATTAGGTTG GTGATGACATCTACTCCCATTCATCAC AGA TG
Rep7*	/BHQ-1/ TG AGA TGGATTGGATGGGTG GTAAGGAACTCTACATTATCTCCTTAC AGA TG
Rep8*	/Cy5.5/ TG AGA TGGGTTGTTTAGGTG GTAAGGAACTCTACATTATCTCCTTAC AGA TG

## Sheet: 32 patterns
strand name	sequence (from 5' to 3')
X15	AAAAAAAAAAAAAAA CCA TCT TT CACACCTCCCAATCA TCT CA
X16	AAAAAAAAAAAAAAA CCA TCT TT CATTCACTATCTACA TCT CA
X17	AAAAAAAAAAAAAAA CCA TCT TT CATTACTTATCCACA TCT CA
X18	AAAAAAAAAAAAAAA CCA TCT TT CAATCTCTCCAAACA TCT CA
X19	AAAAAAAAAAAAAAA CCA TCT TT CACACCAACAACTCA TCT CA
X20	AAAAAAAAAAAAAAA CCA TCT TT CAAACAACTTTTCCA TCT CA
X21	AAAAAAAAAAAAAAA CCA TCT TT CATAACATATCACCA TCT CA
X22	AAAAAAAAAAAAAAA CCA TCT TT CACAAACCTACACCA TCT CA
X23	AAAAAAAAAAAAAAA CCA TCT TT CAATCACCCTATACA TCT CA
X27	AAAAAAAAAAAAAAA CCA TCT TT CAATCTACCAAAACA TCT CA
X28	AAAAAAAAAAAAAAA CCA TCT TT CATTTCACAACACCA TCT CA
X29	AAAAAAAAAAAAAAA CCA TCT TT CACCATCAACTATCA TCT CA
X30	AAAAAAAAAAAAAAA CCA TCT TT CAACTATACAATCCA TCT CA
X31	AAAAAAAAAAAAAAA CCA TCT TT CACTTCAACACACCA TCT CA
X32	AAAAAAAAAAAAAAA CCA TCT TT CAACTCTCTACATCA TCT CA
X33	AAAAAAAAAAAAAAA CCA TCT TT CACATCATCATATCA TCT CA
X34	AAAAAAAAAAAAAAA CCA TCT TT CATATCATACTCCCA TCT CA
X35	AAAAAAAAAAAAAAA CCA TCT TT CATCTCCTTCTACCA TCT CA
X38	AAAAAAAAAAAAAAA CCA TCT TT CAATTCTCCTACCCA TCT CA
X39	AAAAAAAAAAAAAAA CCA TCT TT CATTACACACCCACA TCT CA
X40	AAAAAAAAAAAAAAA CCA TCT TT CAATCAAACATCCCA TCT CA
X41	AAAAAAAAAAAAAAA CCA TCT TT CACCTTACCAAACCA TCT CA
X42	AAAAAAAAAAAAAAA CCA TCT TT CACCTTCAAATCCCA TCT CA
X43	AAAAAAAAAAAAAAA CCA TCT TT CAATACCCACTCTCA TCT CA
X44	AAAAAAAAAAAAAAA CCA TCT TT CAACTCCTACTATCA TCT CA
X45	AAAAAAAAAAAAAAA CCA TCT TT CACCTACTCTCCTCA TCT CA
X46	AAAAAAAAAAAAAAA CCA TCT TT CACATCCATACCTCA TCT CA
X47	AAAAAAAAAAAAAAA CCA TCT TT CATCTTCCTCCCACA TCT CA
X51	AAAAAAAAAAAAAAA CCA TCT TT CACTTCTACAATTCA TCT CA
X52	AAAAAAAAAAAAAAA CCA TCT TT CAACCTTCTCCTCCA TCT CA
X53	AAAAAAAAAAAAAAA CCA TCT TT CAAACTCCTCTAACA TCT CA
X54	AAAAAAAAAAAAAAA CCA TCT TT CACTCTCTTCAACCA TCT CA
X55	AAAAAAAAAAAAAAA CCA TCT TT CATCCCATTTCAACA TCT CA
X56	AAAAAAAAAAAAAAA CCA TCT TT CATTTCTCATCACCA TCT CA
X57	AAAAAAAAAAAAAAA CCA TCT TT CATCAAATCTACTCA TCT CA
X58	AAAAAAAAAAAAAAA CCA TCT TT CACTCCTAATCTTCA TCT CA
X59	AAAAAAAAAAAAAAA CCA TCT TT CAACCTCTCCTATCA TCT CA
X62	AAAAAAAAAAAAAAA CCA TCT TT CAATCTTATCATCCA TCT CA
X63	AAAAAAAAAAAAAAA CCA TCT TT CAACCAACATAACCA TCT CA
X64	AAAAAAAAAAAAAAA CCA TCT TT CATAACCTTTCTTCA TCT CA
X65	AAAAAAAAAAAAAAA CCA TCT TT CAACATACCAAATCA TCT CA
X66	AAAAAAAAAAAAAAA CCA TCT TT CATCCACACTCTTCA TCT CA
X67	AAAAAAAAAAAAAAA CCA TCT TT CAACCATACCACTCA TCT CA
X68	AAAAAAAAAAAAAAA CCA TCT TT CATTCTTCACTAACA TCT CA
X69	AAAAAAAAAAAAAAA CCA TCT TT CACACTAACTCTCCA TCT CA
X70	AAAAAAAAAAAAAAA CCA TCT TT CACCACAACCTACCA TCT CA
X71	AAAAAAAAAAAAAAA CCA TCT TT CACCTTTACATTCCA TCT CA
X74	AAAAAAAAAAAAAAA CCA TCT TT CAACATTCCTCTACA TCT CA
X75	AAAAAAAAAAAAAAA CCA TCT TT CACCTCTACTACTCA TCT CA
X76	AAAAAAAAAAAAAAA CCA TCT TT CAACACTTTCCTACA TCT CA
X77	AAAAAAAAAAAAAAA CCA TCT TT CACACAATACCTCCA TCT CA
X78	AAAAAAAAAAAAAAA CCA TCT TT CAATCCCATCCTTCA TCT CA
X79	AAAAAAAAAAAAAAA CCA TCT TT CATTTCCTATCCTCA TCT CA
X80	AAAAAAAAAAAAAAA CCA TCT TT CACTCTCATAATCCA TCT CA
X81	AAAAAAAAAAAAAAA CCA TCT TT CAATCATCTATTCCA TCT CA
X82	AAAAAAAAAAAAAAA CCA TCT TT CACATCTTCTTCCCA TCT CA
X83	AAAAAAAAAAAAAAA CCA TCT TT CAATTCATCATCTCA TCT CA
X87	AAAAAAAAAAAAAAA CCA TCT TT CAAAACATACTTCCA TCT CA
X88	AAAAAAAAAAAAAAA CCA TCT TT CAACCACACACATCA TCT CA
X89	AAAAAAAAAAAAAAA CCA TCT TT CACACATTCAACCCA TCT CA
X90	AAAAAAAAAAAAAAA CCA TCT TT CATCTAACCTCTTCA TCT CA
X91	AAAAAAAAAAAAAAA CCA TCT TT CAATACTACCTTCCA TCT CA
X92	AAAAAAAAAAAAAAA CCA TCT TT CATCCTCAACACCCA TCT CA
X93	AAAAAAAAAAAAAAA CCA TCT TT CACACCCTCACTACA TCT CA
X94	AAAAAAAAAAAAAAA CCA TCT TT CACCTCACATTTCCA TCT CA
X95	AAAAAAAAAAAAAAA CCA TCT TT CATCAATCACTACCA TCT CA
X98	AAAAAAAAAAAAAAA CCA TCT TT CATCCTAACCTAACA TCT CA
X99	AAAAAAAAAAAAAAA CCA TCT TT CACTCTTCTTTCCCA TCT CA
X100	AAAAAAAAAAAAAAA CCA TCT TT CAAACACCTCATCCA TCT CA
X101	AAAAAAAAAAAAAAA CCA TCT TT CACTCCACAACTACA TCT CA
X102	AAAAAAAAAAAAAAA CCA TCT TT CAAACTACACAATCA TCT CA
X103	AAAAAAAAAAAAAAA CCA TCT TT CATCTTTCCATCCCA TCT CA
X104	AAAAAAAAAAAAAAA CCA TCT TT CATCCATCCTACACA TCT CA
X105	AAAAAAAAAAAAAAA CCA TCT TT CACAACTTCCCACCA TCT CA
X106	AAAAAAAAAAAAAAA CCA TCT TT CACCAATCATACCCA TCT CA
X107	AAAAAAAAAAAAAAA CCA TCT TT CAAATCCACCAACCA TCT CA
X110	AAAAAAAAAAAAAAA CCA TCT TT CAACCCACAAAACCA TCT CA
X111	AAAAAAAAAAAAAAA CCA TCT TT CACCCTCCCTTCTCA TCT CA
X112	AAAAAAAAAAAAAAA CCA TCT TT CATCACATACCTACA TCT CA
X113	AAAAAAAAAAAAAAA CCA TCT TT CAAATCTTTCACCCA TCT CA
X114	AAAAAAAAAAAAAAA CCA TCT TT CAATCCTATTCAACA TCT CA
X115	AAAAAAAAAAAAAAA CCA TCT TT CAAACATTCTACACA TCT CA
X116	AAAAAAAAAAAAAAA CCA TCT TT CAAAACTATTCCTCA TCT CA
X117	AAAAAAAAAAAAAAA CCA TCT TT CAACTAACCTTCACA TCT CA
X118	AAAAAAAAAAAAAAA CCA TCT TT CACCACTATACTCCA TCT CA
X123	AAAAAAAAAAAAAAA CCA TCT TT CACACACTCAATCCA TCT CA
X124	AAAAAAAAAAAAAAA CCA TCT TT CAAACCTCCCTCCCA TCT CA
X125	AAAAAAAAAAAAAAA CCA TCT TT CATCCAACTCTACCA TCT CA
X126	AAAAAAAAAAAAAAA CCA TCT TT CATTCATCTCTTCCA TCT CA
X127	AAAAAAAAAAAAAAA CCA TCT TT CACCTCCTTTACCCA TCT CA
X128	AAAAAAAAAAAAAAA CCA TCT TT CAACAATCTCATACA TCT CA
X129	AAAAAAAAAAAAAAA CCA TCT TT CACCATAACTTCTCA TCT CA
X130	AAAAAAAAAAAAAAA CCA TCT TT CATCTACCTATCACA TCT CA
A9,15-1	TG AGA TGATTGGGAGGTGTG CCTTCTCGAAAGAGTTAAGAGAGAAGG AGA TGG
A11,17-1	TG AGA TGTGGATAAGTAATG CTTTCTAGGTGGGAATGAGATAGAAAG AGA TGG
A12,18-1	TG AGA TGTTTGGAGAGATTG CTTTCTCGTTTGGGAAGGTTGAGAAAG AGA TGG
A7,19-1	TG AGA TGAGTTGTTGGTGTG CCTTTCAATGAAAGAGGAAATGAAAGG AGA TGG
A8,20-1	TG AGA TGGAAAAGTTGTTTG CACTTTCTGAGGTGGGTTATGAAAGTG AGA TGG
A9,21-1	TG AGA TGGTGATATGTTATG CCTTCTCGAAAGAGTTAAGAGAGAAGG AGA TGG
A15,27-1	TG AGA TGTTTTGGTAGATTG CCATACATGTGAAGTTGGATTGTATGG AGA TGG
A17,29-1	TG AGA TGATAGTTGATGGTG CACTCTCAAATCATAAAACAGAGAGTG AGA TGG
A18,30-1	TG AGA TGGATTGTATAGTTG CCACTCCCTACAACAAACTAGGAGTGG AGA TGG
A13,31-1	TG AGA TGGTGTGTTGAAGTG CAACTCTAAGGGTGGTAAAGAGAGTTG AGA TGG
A14,32-1	TG AGA TGATGTAGAGAGTTG CTCTTACGAATAGGTAAAGTGTAAGAG AGA TGG
A2,38-1	TG AGA TGGGTAGGAGAATTG CTATCCTGAGGGTAGTTGAGAGGATAG AGA TGG
A3,39-1	TG AGA TGTGGGTGTGTAATG CTTTTCTATTGATGGAGGTGAGAAAAG AGA TGG
A4,40-1	TG AGA TGGGATGTTTGATTG CCTATCTGAGGGAATTGTTAAGATAGG AGA TGG
A5,41-1	TG AGA TGGTTTGGTAAGGTG CACTCACTGTATGGAGTTATGTGAGTG AGA TGG
A6,42-1	TG AGA TGGGATTTGAAGGTG CCCAAACTGGATTTGTGAATGTTTGGG AGA TGG
A1,43-1	TG AGA TGAGAGTGGGTATTG CTACAACTGTGTGTTTAGATGTTGTAG AGA TGG
A2,44-1	TG AGA TGATAGTAGGAGTTG CTATCCTGAGGGTAGTTGAGAGGATAG AGA TGG
A3,45-1	TG AGA TGAGGAGAGTAGGTG CTTTTCTATTGATGGAGGTGAGAAAAG AGA TGG
A4,46-1	TG AGA TGAGGTATGGATGTG CCTATCTGAGGGAATTGTTAAGATAGG AGA TGG
A9,51-1	TG AGA TGAATTGTAGAAGTG CCTTCTCGAAAGAGTTAAGAGAGAAGG AGA TGG
A10,52-1	TG AGA TGGAGGAGAAGGTTG CTAACCAATGGATGTGGATATGGTTAG AGA TGG
A11,53-1	TG AGA TGTTAGAGGAGTTTG CTTTCTAGGTGGGAATGAGATAGAAAG AGA TGG
A12,54-1	TG AGA TGGTTGAAGAGAGTG CTTTCTCGTTTGGGAAGGTTGAGAAAG AGA TGG
A7,55-1	TG AGA TGTTGAAATGGGATG CCTTTCAATGAAAGAGGAAATGAAAGG AGA TGG
A8,56-1	TG AGA TGGTGATGAGAAATG CACTTTCTGAGGTGGGTTATGAAAGTG AGA TGG
A9,57-1	TG AGA TGAGTAGATTTGATG CCTTCTCGAAAGAGTTAAGAGAGAAGG AGA TGG
A10,58-1	TG AGA TGAAGATTAGGAGTG CTAACCAATGGATGTGGATATGGTTAG AGA TGG
A14,62-1	TG AGA TGGATGATAAGATTG CTCTTACGAATAGGTAAAGTGTAAGAG AGA TGG
A15,63-1	TG AGA TGGTTATGTTGGTTG CCATACATGTGAAGTTGGATTGTATGG AGA TGG
A16,64-1	TG AGA TGAAGAAAGGTTATG CACCAATAGGAATGATGTGAATTGGTG AGA TGG
A17,65-1	TG AGA TGATTTGGTATGTTG CACTCTCAAATCATAAAACAGAGAGTG AGA TGG
A18,66-1	TG AGA TGAAGAGTGTGGATG CCACTCCCTACAACAAACTAGGAGTGG AGA TGG
A13,67-1	TG AGA TGAGTGGTATGGTTG CAACTCTAAGGGTGGTAAAGAGAGTTG AGA TGG
A14,68-1	TG AGA TGTTAGTGAAGAATG CTCTTACGAATAGGTAAAGTGTAAGAG AGA TGG
A15,69-1	TG AGA TGGAGAGTTAGTGTG CCATACATGTGAAGTTGGATTGTATGG AGA TGG
A16,70-1	TG AGA TGGTAGGTTGTGGTG CACCAATAGGAATGATGTGAATTGGTG AGA TGG
A17,71-1	TG AGA TGGAATGTAAAGGTG CACTCTCAAATCATAAAACAGAGAGTG AGA TGG
A2,74-1	TG AGA TGTAGAGGAATGTTG CTATCCTGAGGGTAGTTGAGAGGATAG AGA TGG
A3,75-1	TG AGA TGAGTAGTAGAGGTG CTTTTCTATTGATGGAGGTGAGAAAAG AGA TGG
A4,76-1	TG AGA TGTAGGAAAGTGTTG CCTATCTGAGGGAATTGTTAAGATAGG AGA TGG
A5,77-1	TG AGA TGGAGGTATTGTGTG CACTCACTGTATGGAGTTATGTGAGTG AGA TGG
A6,78-1	TG AGA TGAAGGATGGGATTG CCCAAACTGGATTTGTGAATGTTTGGG AGA TGG
A1,79-1	TG AGA TGAGGATAGGAAATG CTACAACTGTGTGTTTAGATGTTGTAG AGA TGG
A2,80-1	TG AGA TGGATTATGAGAGTG CTATCCTGAGGGTAGTTGAGAGGATAG AGA TGG
A3,81-1	TG AGA TGGAATAGATGATTG CTTTTCTATTGATGGAGGTGAGAAAAG AGA TGG
A4,82-1	TG AGA TGGGAAGAAGATGTG CCTATCTGAGGGAATTGTTAAGATAGG AGA TGG
A5,83-1	TG AGA TGAGATGATGAATTG CACTCACTGTATGGAGTTATGTGAGTG AGA TGG
A9,87-1	TG AGA TGGAAGTATGTTTTG CCTTCTCGAAAGAGTTAAGAGAGAAGG AGA TGG
A10,88-1	TG AGA TGATGTGTGTGGTTG CTAACCAATGGATGTGGATATGGTTAG AGA TGG
A11,89-1	TG AGA TGGGTTGAATGTGTG CTTTCTAGGTGGGAATGAGATAGAAAG AGA TGG
A12,90-1	TG AGA TGAAGAGGTTAGATG CTTTCTCGTTTGGGAAGGTTGAGAAAG AGA TGG
A7,91-1	TG AGA TGGAAGGTAGTATTG CCTTTCAATGAAAGAGGAAATGAAAGG AGA TGG
A8,92-1	TG AGA TGGGTGTTGAGGATG CACTTTCTGAGGTGGGTTATGAAAGTG AGA TGG
A9,93-1	TG AGA TGTAGTGAGGGTGTG CCTTCTCGAAAGAGTTAAGAGAGAAGG AGA TGG
A10,94-1	TG AGA TGGAAATGTGAGGTG CTAACCAATGGATGTGGATATGGTTAG AGA TGG
A11,95-1	TG AGA TGGTAGTGATTGATG CTTTCTAGGTGGGAATGAGATAGAAAG AGA TGG
A15,99-1	TG AGA TGGGAAAGAAGAGTG CCATACATGTGAAGTTGGATTGTATGG AGA TGG
A16,100-1	TG AGA TGGATGAGGTGTTTG CACCAATAGGAATGATGTGAATTGGTG AGA TGG
A17,101-1	TG AGA TGTAGTTGTGGAGTG CACTCTCAAATCATAAAACAGAGAGTG AGA TGG
A18,102-1	TG AGA TGATTGTGTAGTTTG CCACTCCCTACAACAAACTAGGAGTGG AGA TGG
A13,103-1	TG AGA TGGGATGGAAAGATG CAACTCTAAGGGTGGTAAAGAGAGTTG AGA TGG
A14,104-1	TG AGA TGTGTAGGATGGATG CTCTTACGAATAGGTAAAGTGTAAGAG AGA TGG
A15,105-1	TG AGA TGGTGGGAAGTTGTG CCATACATGTGAAGTTGGATTGTATGG AGA TGG
A16,106-1	TG AGA TGGGTATGATTGGTG CACCAATAGGAATGATGTGAATTGGTG AGA TGG
A17,107-1	TG AGA TGGTTGGTGGATTTG CACTCTCAAATCATAAAACAGAGAGTG AGA TGG
A3,111-1	TG AGA TGAGAAGGGAGGGTG CTTTTCTATTGATGGAGGTGAGAAAAG AGA TGG
A4,112-1	TG AGA TGTAGGTATGTGATG CCTATCTGAGGGAATTGTTAAGATAGG AGA TGG
A5,113-1	TG AGA TGGGTGAAAGATTTG CACTCACTGTATGGAGTTATGTGAGTG AGA TGG
A6,114-1	TG AGA TGTTGAATAGGATTG CCCAAACTGGATTTGTGAATGTTTGGG AGA TGG
A1,115-1	TG AGA TGTGTAGAATGTTTG CTACAACTGTGTGTTTAGATGTTGTAG AGA TGG
A2,116-1	TG AGA TGAGGAATAGTTTTG CTATCCTGAGGGTAGTTGAGAGGATAG AGA TGG
A3,117-1	TG AGA TGTGAAGGTTAGTTG CTTTTCTATTGATGGAGGTGAGAAAAG AGA TGG
A4,118-1	TG AGA TGGAGTATAGTGGTG CCTATCTGAGGGAATTGTTAAGATAGG AGA TGG
A9,123-1	TG AGA TGGATTGAGTGTGTG CCTTCTCGAAAGAGTTAAGAGAGAAGG AGA TGG
A10,124-1	TG AGA TGGGAGGGAGGTTTG CTAACCAATGGATGTGGATATGGTTAG AGA TGG
A11,125-1	TG AGA TGGTAGAGTTGGATG CTTTCTAGGTGGGAATGAGATAGAAAG AGA TGG
A12,126-1	TG AGA TGGAAGAGATGAATG CTTTCTCGTTTGGGAAGGTTGAGAAAG AGA TGG
A7,127-1	TG AGA TGGGTAAAGGAGGTG CCTTTCAATGAAAGAGGAAATGAAAGG AGA TGG
A8,128-1	TG AGA TGTATGAGATTGTTG CACTTTCTGAGGTGGGTTATGAAAGTG AGA TGG
A9,129-1	TG AGA TGAGAAGTTATGGTG CCTTCTCGAAAGAGTTAAGAGAGAAGG AGA TGG
A11,17-2	TG AGA TGTGGATAAGTAATG CATCATCTGGAGTATGATATGATGATG AGA TGG
A12,18-2	TG AGA TGTTTGGAGAGATTG CCTCACATAGTGTAAAGAATTGTGAGG AGA TGG
A17,29-2	TG AGA TGATAGTTGATGGTG CACCTCCATAGGTATGATTGGGAGGTG AGA TGG
A18,30-2	TG AGA TGGATTGTATAGTTG CTAACTAATAAGAGGGTATGTAGTTAG AGA TGG
A13,31-2	TG AGA TGGTGTGTTGAAGTG CCCTACAATATGAATGGAGATGTAGGG AGA TGG
A14,32-2	TG AGA TGATGTAGAGAGTTG CACAATCGTTTGTGTTATGAGATTGTG AGA TGG
A15,33-2	TG AGA TGATATGATGATGTG CCCATCATAGATTGTATAGTTGATGGG AGA TGG
A16,34-2	TG AGA TGGGAGTATGATATG CAAACCTATTGTAGGTGTTAAGGTTTG AGA TGG
A3,39-2	TG AGA TGTGGGTGTGTAATG CTTATCATGGTGAGTAGATTTGATAAG AGA TGG
A4,40-2	TG AGA TGGGATGTTTGATTG CCACACAAAATGAGAAGATATGTGTGG AGA TGG
A5,41-2	TG AGA TGGTTTGGTAAGGTG CTCCACAAGATTAGTAAGAGTGTGGAG AGA TGG
A6,42-2	TG AGA TGGGATTTGAAGGTG CAACCTCAAGGATAAGAGTAGAGGTTG AGA TGG
A1,43-2	TG AGA TGAGAGTGGGTATTG CATTCACAATGTTGTTTGAGGTGAATG AGA TGG
A2,44-2	TG AGA TGATAGTAGGAGTTG CAATCAAAATAGGATGAGAGTTGATTG AGA TGG
A3,45-2	TG AGA TGAGGAGAGTAGGTG CTTATCATGGTGAGTAGATTTGATAAG AGA TGG
A4,46-2	TG AGA TGAGGTATGGATGTG CCACACAAAATGAGAAGATATGTGTGG AGA TGG
A9,51-2	TG AGA TGAATTGTAGAAGTG CACTTCAGAGTGAGATGTGGTGAAGTG AGA TGG
A10,52-2	TG AGA TGGAGGAGAAGGTTG CCTATCTATGAATGTATTGGAGATAGG AGA TGG
A11,53-2	TG AGA TGTTAGAGGAGTTTG CATCATCTGGAGTATGATATGATGATG AGA TGG
A12,54-2	TG AGA TGGTTGAAGAGAGTG CCTCACATAGTGTAAAGAATTGTGAGG AGA TGG
A7,55-2	TG AGA TGTTGAAATGGGATG CTTTCTTGAGTAGTTTAGAGAAGAAAG AGA TGG
A8,56-2	TG AGA TGGTGATGAGAAATG CTCCTTCATAAGTTTAGGTGGAAGGAG AGA TGG
A9,57-2	TG AGA TGAGTAGATTTGATG CACTTCAGAGTGAGATGTGGTGAAGTG AGA TGG
A10,58-2	TG AGA TGAAGATTAGGAGTG CCTATCTATGAATGTATTGGAGATAGG AGA TGG
A11,59-2	TG AGA TGATAGGAGAGGTTG CATCATCTGGAGTATGATATGATGATG AGA TGG
A15,63-2	TG AGA TGGTTATGTTGGTTG CCCATCATAGATTGTATAGTTGATGGG AGA TGG
A16,64-2	TG AGA TGAAGAAAGGTTATG CAAACCTATTGTAGGTGTTAAGGTTTG AGA TGG
A17,65-2	TG AGA TGATTTGGTATGTTG CACCTCCATAGGTATGATTGGGAGGTG AGA TGG
A18,66-2	TG AGA TGAAGAGTGTGGATG CTAACTAATAAGAGGGTATGTAGTTAG AGA TGG
A13,67-2	TG AGA TGAGTGGTATGGTTG CCCTACAATATGAATGGAGATGTAGGG AGA TGG
A14,68-2	TG AGA TGTTAGTGAAGAATG CACAATCGTTTGTGTTATGAGATTGTG AGA TGG
A15,69-2	TG AGA TGGAGAGTTAGTGTG CCCATCATAGATTGTATAGTTGATGGG AGA TGG
A16,70-2	TG AGA TGGTAGGTTGTGGTG CAAACCTATTGTAGGTGTTAAGGTTTG AGA TGG
A17,71-2	TG AGA TGGAATGTAAAGGTG CACCTCCATAGGTATGATTGGGAGGTG AGA TGG
A4,76-2	TG AGA TGTAGGAAAGTGTTG CCACACAAAATGAGAAGATATGTGTGG AGA TGG
A5,77-2	TG AGA TGGAGGTATTGTGTG CTCCACAAGATTAGTAAGAGTGTGGAG AGA TGG
A6,78-2	TG AGA TGAAGGATGGGATTG CAACCTCAAGGATAAGAGTAGAGGTTG AGA TGG
A1,79-2	TG AGA TGAGGATAGGAAATG CATTCACAATGTTGTTTGAGGTGAATG AGA TGG
A2,80-2	TG AGA TGGATTATGAGAGTG CAATCAAAATAGGATGAGAGTTGATTG AGA TGG
A3,81-2	TG AGA TGGAATAGATGATTG CTTATCATGGTGAGTAGATTTGATAAG AGA TGG
A4,82-2	TG AGA TGGGAAGAAGATGTG CCACACAAAATGAGAAGATATGTGTGG AGA TGG
A5,83-2	TG AGA TGAGATGATGAATTG CTCCACAAGATTAGTAAGAGTGTGGAG AGA TGG
A9,87-2	TG AGA TGGAAGTATGTTTTG CACTTCAGAGTGAGATGTGGTGAAGTG AGA TGG
A10,88-2	TG AGA TGATGTGTGTGGTTG CCTATCTATGAATGTATTGGAGATAGG AGA TGG
A11,89-2	TG AGA TGGGTTGAATGTGTG CATCATCTGGAGTATGATATGATGATG AGA TGG
A12,90-2	TG AGA TGAAGAGGTTAGATG CCTCACATAGTGTAAAGAATTGTGAGG AGA TGG
A7,91-2	TG AGA TGGAAGGTAGTATTG CTTTCTTGAGTAGTTTAGAGAAGAAAG AGA TGG
A8,92-2	TG AGA TGGGTGTTGAGGATG CTCCTTCATAAGTTTAGGTGGAAGGAG AGA TGG
A9,93-2	TG AGA TGTAGTGAGGGTGTG CACTTCAGAGTGAGATGTGGTGAAGTG AGA TGG
A10,94-2	TG AGA TGGAAATGTGAGGTG CCTATCTATGAATGTATTGGAGATAGG AGA TGG
A11,95-2	TG AGA TGGTAGTGATTGATG CATCATCTGGAGTATGATATGATGATG AGA TGG
A14,98-2	TG AGA TGTTAGGTTAGGATG CACAATCGTTTGTGTTATGAGATTGTG AGA TGG
A15,99-2	TG AGA TGGGAAAGAAGAGTG CCCATCATAGATTGTATAGTTGATGGG AGA TGG
A16,100-2	TG AGA TGGATGAGGTGTTTG CAAACCTATTGTAGGTGTTAAGGTTTG AGA TGG
A17,101-2	TG AGA TGTAGTTGTGGAGTG CACCTCCATAGGTATGATTGGGAGGTG AGA TGG
A18,102-2	TG AGA TGATTGTGTAGTTTG CTAACTAATAAGAGGGTATGTAGTTAG AGA TGG
A13,103-2	TG AGA TGGGATGGAAAGATG CCCTACAATATGAATGGAGATGTAGGG AGA TGG
A14,104-2	TG AGA TGTGTAGGATGGATG CACAATCGTTTGTGTTATGAGATTGTG AGA TGG
A15,105-2	TG AGA TGGTGGGAAGTTGTG CCCATCATAGATTGTATAGTTGATGGG AGA TGG
A16,106-2	TG AGA TGGGTATGATTGGTG CAAACCTATTGTAGGTGTTAAGGTTTG AGA TGG
A17,107-2	TG AGA TGGTTGGTGGATTTG CACCTCCATAGGTATGATTGGGAGGTG AGA TGG
A3,111-2	TG AGA TGAGAAGGGAGGGTG CTTATCATGGTGAGTAGATTTGATAAG AGA TGG
A4,112-2	TG AGA TGTAGGTATGTGATG CCACACAAAATGAGAAGATATGTGTGG AGA TGG
A5,113-2	TG AGA TGGGTGAAAGATTTG CTCCACAAGATTAGTAAGAGTGTGGAG AGA TGG
A6,114-2	TG AGA TGTTGAATAGGATTG CAACCTCAAGGATAAGAGTAGAGGTTG AGA TGG
A1,115-2	TG AGA TGTGTAGAATGTTTG CATTCACAATGTTGTTTGAGGTGAATG AGA TGG
A2,116-2	TG AGA TGAGGAATAGTTTTG CAATCAAAATAGGATGAGAGTTGATTG AGA TGG
A4,118-2	TG AGA TGGAGTATAGTGGTG CCACACAAAATGAGAAGATATGTGTGG AGA TGG
A9,123-2	TG AGA TGGATTGAGTGTGTG CACTTCAGAGTGAGATGTGGTGAAGTG AGA TGG
A10,124-2	TG AGA TGGGAGGGAGGTTTG CCTATCTATGAATGTATTGGAGATAGG AGA TGG
A11,125-2	TG AGA TGGTAGAGTTGGATG CATCATCTGGAGTATGATATGATGATG AGA TGG
A12,126-2	TG AGA TGGAAGAGATGAATG CCTCACATAGTGTAAAGAATTGTGAGG AGA TGG
A7,127-2	TG AGA TGGGTAAAGGAGGTG CTTTCTTGAGTAGTTTAGAGAAGAAAG AGA TGG
A9,129-2	TG AGA TGAGAAGTTATGGTG CACTTCAGAGTGAGATGTGGTGAAGTG AGA TGG
A10,130-2	TG AGA TGTGATAGGTAGATG CCTATCTATGAATGTATTGGAGATAGG AGA TGG
A10,16-3	TG AGA TGTAGATAGTGAATG CCCTCTATAAGAGTTGTGGTTAGAGGG AGA TGG
A11,17-3	TG AGA TGTGGATAAGTAATG CATAACTTTATGTAGGAGGTAGTTATG AGA TGG
A9,21-3	TG AGA TGGTGATATGTTATG CCTTACCGATGTGTAGGTTTGGTAAGG AGA TGG
A10,22-3	TG AGA TGGTGTAGGTTTGTG CCCTCTATAAGAGTTGTGGTTAGAGGG AGA TGG
A11,23-3	TG AGA TGTATAGGGTGATTG CATAACTTTATGTAGGAGGTAGTTATG AGA TGG
A15,27-3	TG AGA TGTTTTGGTAGATTG CCCTATCTTAAGGTGAGATTGATAGGG AGA TGG
A16,28-3	TG AGA TGGTGTTGTGAAATG CTACACTTGGTTAGATAAGTAGTGTAG AGA TGG
A17,29-3	TG AGA TGATAGTTGATGGTG CTTCCTCTATGTGAAGAGATGAGGAAG AGA TGG
A18,30-3	TG AGA TGGATTGTATAGTTG CTCTCAAAATAGTGAGGGTGTTGAGAG AGA TGG
A13,31-3	TG AGA TGGTGTGTTGAAGTG CTCTCCAAAGAAGTAAGGAGTGGAGAG AGA TGG
A14,32-3	TG AGA TGATGTAGAGAGTTG CTACACCTGTTTGTTTTGGTGGTGTAG AGA TGG
A15,33-3	TG AGA TGATATGATGATGTG CCCTATCTTAAGGTGAGATTGATAGGG AGA TGG
A16,34-3	TG AGA TGGGAGTATGATATG CTACACTTGGTTAGATAAGTAGTGTAG AGA TGG
A17,35-3	TG AGA TGGTAGAAGGAGATG CTTCCTCTATGTGAAGAGATGAGGAAG AGA TGG
A3,39-3	TG AGA TGTGGGTGTGTAATG CTACCACTTAGAAGTTAGGTGTGGTAG AGA TGG
A4,40-3	TG AGA TGGGATGTTTGATTG CCTTTACTAGATAGAGGAATGTAAAGG AGA TGG
A5,41-3	TG AGA TGGTTTGGTAAGGTG CCTACTCAATTGTAGAAGGAGAGTAGG AGA TGG
A6,42-3	TG AGA TGGGATTTGAAGGTG CCATTCTTATTGGATGAGTTAGAATGG AGA TGG
A1,43-3	TG AGA TGAGAGTGGGTATTG CACCTCAGATATGGAGAGGGTGAGGTG AGA TGG
A2,44-3	TG AGA TGATAGTAGGAGTTG CTACTTCTGGTGGAGGAATTGAAGTAG AGA TGG
A3,45-3	TG AGA TGAGGAGAGTAGGTG CTACCACTTAGAAGTTAGGTGTGGTAG AGA TGG
A4,46-3	TG AGA TGAGGTATGGATGTG CCTTTACTAGATAGAGGAATGTAAAGG AGA TGG
A5,47-3	TG AGA TGTGGGAGGAAGATG CCTACTCAATTGTAGAAGGAGAGTAGG AGA TGG
A10,52-3	TG AGA TGGAGGAGAAGGTTG CCCTCTA TAAGAGTTGTGGT TAGAGGG AGA TGG
A11,53-3	TG AGA TGTTAGAGGAGTTTG CATAACTTTATGTAGGAGGTAGTTATG AGA TGG
A12,54-3	TG AGA TGGTTGAAGAGAGTG CCATCTTTGGTTGTATTGATAAGATGG AGA TGG
A7,55-3	TG AGA TGTTGAAATGGGATG CCTCTCAGAAGGTGAAGTAGTGAGAGG AGA TGG
A8,56-3	TG AGA TGGTGATGAGAAATG CACTACCTTGTAAAGTATTGGGTAGTG AGA TGG
A9,57-3	TG AGA TGAGTAGATTTGATG CCTTACCGATGTGTAGGTTTGGTAAGG AGA TGG
A10,58-3	TG AGA TGAAGATTAGGAGTG CCCTCTATAAGAGTTGTGGTTAGAGGG AGA TGG
A11,59-3	TG AGA TGATAGGAGAGGTTG CATAACTTTATGTAGGAGGTAGTTATG AGA TGG
A15,63-3	TG AGA TGGTTATGTTGGTTG CCCTATCTTAAGGTGAGATTGATAGGG AGA TGG
A16,64-3	TG AGA TGAAGAAAGGTTATG CTACACTTGGTTAGATAAGTAGTGTAG AGA TGG
A17,65-3	TG AGA TGATTTGGTATGTTG CTTCCTCTATGTGAAGAGATGAGGAAG AGA TGG
A18,66-3	TG AGA TGAAGAGTGTGGATG CTCTCAAAATAGTGAGGGTGTTGAGAG AGA TGG
A13,67-3	TG AGA TGAGTGGTATGGTTG CTCTCCA AAGAAGTAAGGAG TGGAGAG AGA TGG
A14,68-3	TG AGA TGTTAGTGAAGAATG CTACACCTGTTTGTTTTGGTGGTGTAG AGA TGG
A15,69-3	TG AGA TGGAGAGTTAGTGTG CCCTATCTTAAGGTGAGATTGATAGGG AGA TGG
A16,70-3	TG AGA TGGTAGGTTGTGGTG CTACACTTGGTTAGATAAGTAGTGTAG AGA TGG
A3,75-3	TG AGA TGAGTAGTAGAGGTG CTACCACTTAGAAGTTAGGTGTGGTAG AGA TGG
A4,76-3	TG AGA TGTAGGAAAGTGTTG CCTTTACTAGATAGAGGAATGTAAAGG AGA TGG
A5,77-3	TG AGA TGGAGGTATTGTGTG CCTACTCAATTGTAGAAGGAGAGTAGG AGA TGG
A6,78-3	TG AGA TGAAGGATGGGATTG CCATTCTTATTGGATGAGTTAGAATGG AGA TGG
A1,79-3	TG AGA TGAGGATAGGAAATG CACCTCAGATATGGAGAGGGTGAGGTG AGA TGG
A2,80-3	TG AGA TGGATTATGAGAGTG CTACTTCTGGTGGAGGAATTGAAGTAG AGA TGG
A3,81-3	TG AGA TGGAATAGATGATTG CTACCACTTAGAAGTTAGGTGTGGTAG AGA TGG
A4,82-3	TG AGA TGGGAAGAAGATGTG CCTTTACTAGATAGAGGAATGTAAAGG AGA TGG
A9,87-3	TG AGA TGGAAGTATGTTTTG CCTTACCGATGTGTAGGTTTGGTAAGG AGA TGG
A10,88-3	TG AGA TGATGTGTGTGGTTG CCCTCTATAAGAGTTGTGGTTAGAGGG AGA TGG
A11,89-3	TG AGA TGGGTTGAATGTGTG CATAACTTTATGTAGGAGGTAGTTATG AGA TGG
A12,90-3	TG AGA TGAAGAGGTTAGATG CCATCTTTGGTTGTATTGATAAGATGG AGA TGG
A7,91-3	TG AGA TGGAAGGTAGTATTG CCTCTCAGAAGGTGAAGTAGTGAGAGG AGA TGG
A8,92-3	TG AGA TGGGTGTTGAGGATG CACTACCTTGTAAAGTATTGGGTAGTG AGA TGG
A9,93-3	TG AGA TGTAGTGAGGGTGTG CCTTACCGATGTGTAGGTTTGGTAAGG AGA TGG
A10,94-3	TG AGA TGGAAATGTGAGGTG CCCTCTATAAGAGTTGTGGTTAGAGGG AGA TGG
A14,98-3	TG AGA TGTTAGGTTAGGATG CTACACCTGTTTGTTTTGGTGGTGTAG AGA TGG
A15,99-3	TG AGA TGGGAAAGAAGAGTG CCCTATCTTAAGGTGAGATTGATAGGG AGA TGG
A16,100-3	TG AGA TGGATGAGGTGTTTG CTACACTTGGTTAGATAAGTAGTGTAG AGA TGG
A17,101-3	TG AGA TGTAGTTGTGGAGTG CTTCCTCTATGTGAAGAGATGAGGAAG AGA TGG
A18,102-3	TG AGA TGATTGTGTAGTTTG CTCTCAAAATAGTGAGGGTGTTGAGAG AGA TGG
A13,103-3	TG AGA TGGGATGGAAAGATG CTCTCCAAAGAAGTAAGGAGTGGAGAG AGA TGG
A14,104-3	TG AGA TGTGTAGGATGGATG CTACACCTGTTTGTTTTGGTGGTGTAG AGA TGG
A15,105-3	TG AGA TGGTGGGAAGTTGTG CCCTATCTTAAGGTGAGATTGATAGGG AGA TGG
A16,106-3	TG AGA TGGGTATGATTGGTG CTACACTTGGTTAGATAAGTAGTGTAG AGA TGG
A2,110-3	TG AGA TGGTTTTGTGGGTTG CTACTTCTGGTGGAGGAATTGAAGTAG AGA TGG
A3,111-3	TG AGA TGAGAAGGGAGGGTG CTACCACTTAGAAGTTAGGTGTGGTAG AGA TGG
A4,112-3	TG AGA TGTAGGTATGTGATG CCTTTACTAGATAGAGGAATGTAAAGG AGA TGG
A5,113-3	TG AGA TGGGTGAAAGATTTG CCTACTCAATTGTAGAAGGAGAGTAGG AGA TGG
A6,114-3	TG AGA TGTTGAATAGGATTG CCATTCTTATTGGATGAGTTAGAATGG AGA TGG
A2,116-3	TG AGA TGAGGAATAGTTTTG CTACTTCTGGTGGAGGAATTGAAGTAG AGA TGG
A3,117-3	TG AGA TGTGAAGGTTAGTTG CTACCACTTAGAAGTTAGGTGTGGTAG AGA TGG
A9,123-3	TG AGA TGGATTGAGTGTGTG CCTTACCGATGTGTAGGTTTGGTAAGG AGA TGG
A10,124-3	TG AGA TGGGAGGGAGGTTTG CCCTCTATAAGAGTTGTGGTTAGAGGG AGA TGG
A11,125-3	TG AGA TGGTAGAGTTGGATG CATAACTTTATGTAGGAGGTAGTTATG AGA TGG
A9,129-3	TG AGA TGAGAAGTTATGGTG CCTTACCGATGTGTAGGTTTGGTAAGG AGA TGG
A10,130-3	TG AGA TGTGATAGGTAGATG CCCTCTATAAGAGTTGTGGTTAGAGGG AGA TGG
A11,17-4	TG AGA TGTGGATAAGTAATG CACATCCATGTGTTTGAATAGGATGTG AGA TGG
A7,19-4	TG AGA TGAGTTGTTGGTGTG CATTCATAAGGGAATAGATGATGAATG AGA TGG
A9,21-4	TG AGA TGGTGATATGTTATG CTTCACATATGGATTAGTGTTGTGAAG AGA TGG
A15,27-4	TG AGA TGTTTTGGTAGATTG CCCACCCTGAGAAGTGATGTGGGTGGG AGA TGG
A16,28-4	TG AGA TGGTGTTGTGAAATG CATCAATGTGGATAGGTGTGATTGATG AGA TGG
A17,29-4	TG AGA TGATAGTTGATGGTG CATCCCTGTTATGATTAGTTAGGGATG AGA TGG
A18,30-4	TG AGA TGGATTGTATAGTTG CTTCACCTAGAAGTGTAGATGGTGAAG AGA TGG
A13,31-4	TG AGA TGGTGTGTTGAAGTG CTCACCAGAATTGAGATGAGTGGTGAG AGA TGG
A14,32-4	TG AGA TGATGTAGAGAGTTG CTTTCATAAAAGAGTAAGGGATGAAAG AGA TGG
A15,33-4	TG AGA TGATATGATGATGTG CCCACCCTGAGAAGTGATGTGGGTGGG AGA TGG
A16,34-4	TG AGA TGGGAGTATGATATG CATCAATGTGGATAGGTGTGATTGATG AGA TGG
A2,38-4	TG AGA TGGGTAGGAGAATTG CATCTTCAGTGTGGGAGGAAGAAGATG AGA TGG
A3,39-4	TG AGA TGTGGGTGTGTAATG CTCTAACTATTGGTAGTGTTGTTAGAG AGA TGG
A4,40-4	TG AGA TGGGATGTTTGATTG CTACTCCATTTGTTAGGTTAGGAGTAG AGA TGG
A5,41-4	TG AGA TGGTTTGGTAAGGTG CTTACCATTGTTGAGTAAGTTGGTAAG AGA TGG
A6,42-4	TG AGA TGGGATTTGAAGGTG CATTCCAATTAGGTGGTTTGTGGAATG AGA TGG
A1,43-4	TG AGA TGAGAGTGGGTATTG CTCCCAATGGAAATGGATGTTTGGGAG AGA TGG
A2,44-4	TG AGA TGATAGTAGGAGTTG CATCTTCAGTGTGGGAGGAAGAAGATG AGA TGG
A3,45-4	TG AGA TGAGGAGAGTAGGTG CTCTAACTATTGGTAGTGTTGTTAGAG AGA TGG
A4,46-4	TG AGA TGAGGTATGGATGTG CTACTCCATTTGTTAGGTTAGGAGTAG AGA TGG
A9,51-4	TG AGA TGAATTGTAGAAGTG CTTCACATATGGATTAGTGTTGTGAAG AGA TGG
A10,52-4	TG AGA TGGAGGAGAAGGTTG CTACTCCTTGGAAAGTTTTGGGAGTAG AGA TGG
A11,53-4	TG AGA TGTTAGAGGAGTTTG CACATCCATGTGTTTGAATAGGATGTG AGA TGG
A12,54-4	TG AGA TGGTTGAAGAGAGTG CCTCCACTGATTGTGTAGTTGTGGAGG AGA TGG
A7,55-4	TG AGA TGTTGAAATGGGATG CATTCATAAGGGAATAGATGATGAATG AGA TGG
A8,56-4	TG AGA TGGTGATGAGAAATG CTTTTCAGGAGGGAAGGGTATGAAAAG AGA TGG
A9,57-4	TG AGA TGAGTAGATTTGATG CTTCACATATGGATTAGTGTTGTGAAG AGA TGG
A10,58-4	TG AGA TGAAGATTAGGAGTG CTACTCCTTGGAAAGTTTTGGGAGTAG AGA TGG
A15,63-4	TG AGA TGGTTATGTTGGTTG CCCACCCTGAGAAGTGATGTGGGTGGG AGA TGG
A16,64-4	TG AGA TGAAGAAAGGTTATG CATCAATGTGGATAGGTGTGATTGATG AGA TGG
A17,65-4	TG AGA TGATTTGGTATGTTG CATCCCTGTTATGATTAGTTAGGGATG AGA TGG
A18,66-4	TG AGA TGAAGAGTGTGGATG CTTCACCTAGAAGTGTAGATGGTGAAG AGA TGG
A13,67-4	TG AGA TGAGTGGTATGGTTG CTCACCAGAATTGAGATGAGTGGTGAG AGA TGG
A14,68-4	TG AGA TGTTAGTGAAGAATG CTTTCATAAAAGAGTAAGGGATGAAAG AGA TGG
A15,69-4	TG AGA TGGAGAGTTAGTGTG CCCACCCTGAGAAGTGATGTGGGTGGG AGA TGG
A16,70-4	TG AGA TGGTAGGTTGTGGTG CATCAATGTGGATAGGTGTGATTGATG AGA TGG
A3,75-4	TG AGA TGAGTAGTAGAGGTG CTCTAACTATTGGTAGTGTTGTTAGAG AGA TGG
A4,76-4	TG AGA TGTAGGAAAGTGTTG CTACTCCATTTGTTAGGTTAGGAGTAG AGA TGG
A5,77-4	TG AGA TGGAGGTATTGTGTG CTTACCATTGTTGAGTAAGTTGGTAAG AGA TGG
A6,78-4	TG AGA TGAAGGATGGGATTG CATTCCAATTAGGTGGTTTGTGGAATG AGA TGG
A1,79-4	TG AGA TGAGGATAGGAAATG CTCCCAATGGAAATGGATGTTTGGGAG AGA TGG
A2,80-4	TG AGA TGGATTATGAGAGTG CATCTTCAGTGTGGGAGGAAGAAGATG AGA TGG
A3,81-4	TG AGA TGGAATAGATGATTG CTCTAACTATTGGTAGTGTTGTTAGAG AGA TGG
A4,82-4	TG AGA TGGGAAGAAGATGTG CTACTCCATTTGTTAGGTTAGGAGTAG AGA TGG
A9,87-4	TG AGA TGGAAGTATGTTTTG CTTCACATATGGATTAGTGTTGTGAAG AGA TGG
A10,88-4	TG AGA TGATGTGTGTGGTTG CTACTCCTTGGAAAGTTTTGGGAGTAG AGA TGG
A11,89-4	TG AGA TGGGTTGAATGTGTG CACATCCATGTGTTTGAATAGGATGTG AGA TGG
A12,90-4	TG AGA TGAAGAGGTTAGATG CCTCCACTGATTGTGTAGTTGTGGAGG AGA TGG
A7,91-4	TG AGA TGGAAGGTAGTATTG CATTCATAAGGGAATAGATGATGAATG AGA TGG
A8,92-4	TG AGA TGGGTGTTGAGGATG CTTTTCAGGAGGGAAGGGTATGAAAAG AGA TGG
A9,93-4	TG AGA TGTAGTGAGGGTGTG CTTCACATATGGATTAGTGTTGTGAAG AGA TGG
A10,94-4	TG AGA TGGAAATGTGAGGTG CTACTCCTTGGAAAGTTTTGGGAGTAG AGA TGG
A11,95-4	TG AGA TGGTAGTGATTGATG CACATCCATGTGTTTGAATAGGATGTG AGA TGG
A15,99-4	TG AGA TGGGAAAGAAGAGTG CCCACCCTGAGAAGTGATGTGGGTGGG AGA TGG
A16,100-4	TG AGA TGGATGAGGTGTTTG CATCAATGTGGATAGGTGTGATTGATG AGA TGG
A17,101-4	TG AGA TGTAGTTGTGGAGTG CATCCCTGTTATGATTAGTTAGGGATG AGA TGG
A18,102-4	TG AGA TGATTGTGTAGTTTG CTTCACCTAGAAGTGTAGATGGTGAAG AGA TGG
A13,103-4	TG AGA TGGGATGGAAAGATG CTCACCAGAATTGAGATGAGTGGTGAG AGA TGG
A14,104-4	TG AGA TGTGTAGGATGGATG CTTTCATAAAAGAGTAAGGGATGAAAG AGA TGG
A15,105-4	TG AGA TGGTGGGAAGTTGTG CCCACCCTGAGAAGTGATGTGGGTGGG AGA TGG
A16,106-4	TG AGA TGGGTATGATTGGTG CATCAATGTGGATAGGTGTGATTGATG AGA TGG
A17,107-4	TG AGA TGGTTGGTGGATTTG CATCCCTGTTATGATTAGTTAGGGATG AGA TGG
A3,111-4	TG AGA TGAGAAGGGAGGGTG CTCTAACTATTGGTAGTGTTGTTAGAG AGA TGG
A4,112-4	TG AGA TGTAGGTATGTGATG CTACTCCATTTGTTAGGTTAGGAGTAG AGA TGG
A5,113-4	TG AGA TGGGTGAAAGATTTG CTTACCATTGTTGAGTAAGTTGGTAAG AGA TGG
A6,114-4	TG AGA TGTTGAATAGGATTG CATTCCAATTAGGTGGTTTGTGGAATG AGA TGG
A1,115-4	TG AGA TGTGTAGAATGTTTG CTCCCAATGGAAATGGATGTTTGGGAG AGA TGG
A2,116-4	TG AGA TGAGGAATAGTTTTG CATCTTCAGTGTGGGAGGAAGAAGATG AGA TGG
A3,117-4	TG AGA TGTGAAGGTTAGTTG CTCTAACTATTGGTAGTGTTGTTAGAG AGA TGG
A4,118-4	TG AGA TGGAGTATAGTGGTG CTACTCCATTTGTTAGGTTAGGAGTAG AGA TGG
A10,124-4	TG AGA TGGGAGGGAGGTTTG CTACTCCTTGGAAAGTTTTGGGAGTAG AGA TGG
A11,125-4	TG AGA TGGTAGAGTTGGATG CACATCCATGTGTTTGAATAGGATGTG AGA TGG
A7,127-4	TG AGA TGGGTAAAGGAGGTG CATTCATAAGGGAATAGATGATGAATG AGA TGG
A8,128-4	TG AGA TGTATGAGATTGTTG CTTTTCAGGAGGGAAGGGTATGAAAAG AGA TGG
A9,129-4	TG AGA TGAGAAGTTATGGTG CTTCACATATGGATTAGTGTTGTGAAG AGA TGG
P15,1-1	CACACCTCCCAATCA TCT CATTCCCACTAACCA TCT CA
P17,2-1	CATTACTTATCCACA TCT CAAACTTACTATCCA TCT CA
P18,2-1	CAATCTCTCCAAACA TCT CATTCCCACTAACCA TCT CA
P19,3-1	CACACCAACAACTCA TCT CAATCCACTTTCACA TCT CA
P20,3-1	CAAACAACTTTTCCA TCT CAATCCACTTTCACA TCT CA
P21,3-1	CATAACATATCACCA TCT CAATCCACTTTCACA TCT CA
P27,2-1	CAATCTACCAAAACA TCT CAAACTTACTATCCA TCT CA
P29,2-1	CACCATCAACTATCA TCT CAAACTTACTATCCA TCT CA
P30,2-1	CAACTATACAATCCA TCT CAAACTTACTATCCA TCT CA
P31,3-1	CACTTCAACACACCA TCT CAATCCACTTTCACA TCT CA
P32,3-1	CAACTCTCTACATCA TCT CAATCCACTTTCACA TCT CA
P38,5-1	CAATTCTCCTACCCA TCT CATACACCCTTAACA TCT CA
P39,6-1	CATTACACACCCACA TCT CACTTACCTAACCCA TCT CA
P40,6-1	CAATCAAACATCCCA TCT CACTTACCTAACCCA TCT CA
P41,6-1	CACCTTACCAAACCA TCT CACTTACCTAACCCA TCT CA
P42,5-1	CACCTTCAAATCCCA TCT CATACACCCTTAACA TCT CA
P43,7-1	CAATACCCACTCTCA TCT CATACCCTTATCCCA TCT CA
P44,7-1	CAACTCCTACTATCA TCT CATACCCTTATCCCA TCT CA
P45,8-1	CACCTACTCTCCTCA TCT CATCTCTACCCTTCA TCT CA
P46,8-1	CACATCCATACCTCA TCT CATCTCTACCCTTCA TCT CA
P51,5-1	CACTTCTACAATTCA TCT CATACACCCTTAACA TCT CA
P52,5-1	CAACCTTCTCCTCCA TCT CATACACCCTTAACA TCT CA
P53,6-1	CAAACTCCTCTAACA TCT CACTTACCTAACCCA TCT CA
P54,5-1	CACTCTCTTCAACCA TCT CATACACCCTTAACA TCT CA
P55,7-1	CATCCCATTTCAACA TCT CATACCCTTATCCCA TCT CA
P56,7-1	CATTTCTCATCACCA TCT CATACCCTTATCCCA TCT CA
P57,7-1	CATCAAATCTACTCA TCT CATACCCTTATCCCA TCT CA
P58,7-1	CACTCCTAATCTTCA TCT CATACCCTTATCCCA TCT CA
P62,5-1	CAATCTTATCATCCA TCT CATACACCCTTAACA TCT CA
P63,6-1	CAACCAACATAACCA TCT CACTTACCTAACCCA TCT CA
P64,6-1	CATAACCTTTCTTCA TCT CACTTACCTAACCCA TCT CA
P65,6-1	CAACATACCAAATCA TCT CACTTACCTAACCCA TCT CA
P66,6-1	CATCCACACTCTTCA TCT CACTTACCTAACCCA TCT CA
P67,7-1	CAACCATACCACTCA TCT CATACCCTTATCCCA TCT CA
P68,7-1	CATTCTTCACTAACA TCT CATACCCTTATCCCA TCT CA
P69,8-1	CACACTAACTCTCCA TCT CATCTCTACCCTTCA TCT CA
P70,8-1	CACCACAACCTACCA TCT CATCTCTACCCTTCA TCT CA
P71,8-1	CACCTTTACATTCCA TCT CATCTCTACCCTTCA TCT CA
P74,9-1	CAACATTCCTCTACA TCT CACTTTCTATTCACA TCT CA
P75,10-1	CACCTCTACTACTCA TCT CAACAAACCACCTCA TCT CA
P76,10-1	CAACACTTTCCTACA TCT CAACAAACCACCTCA TCT CA
P77,10-1	CACACAATACCTCCA TCT CAACAAACCACCTCA TCT CA
P78,9-1	CAATCCCATCCTTCA TCT CACTTTCTATTCACA TCT CA
P79,11-1	CATTTCCTATCCTCA TCT CATTCAATACAACCA TCT CA
P80,11-1	CACTCTCATAATCCA TCT CATTCAATACAACCA TCT CA
P81,12-1	CAATCATCTATTCCA TCT CACTTAACCCTTACA TCT CA
P82,12-1	CACATCTTCTTCCCA TCT CACTTAACCCTTACA TCT CA
P83,12-1	CAATTCATCATCTCA TCT CACTTAACCCTTACA TCT CA
P87,9-1	CAAAACATACTTCCA TCT CACTTTCTATTCACA TCT CA
P88,9-1	CAACCACACACATCA TCT CACTTTCTATTCACA TCT CA
P89,10-1	CACACATTCAACCCA TCT CAACAAACCACCTCA TCT CA
P90,9-1	CATCTAACCTCTTCA TCT CACTTTCTATTCACA TCT CA
P91,11-1	CAATACTACCTTCCA TCT CATTCAATACAACCA TCT CA
P92,11-1	CATCCTCAACACCCA TCT CATTCAATACAACCA TCT CA
P93,11-1	CACACCCTCACTACA TCT CATTCAATACAACCA TCT CA
P94,11-1	CACCTCACATTTCCA TCT CATTCAATACAACCA TCT CA
P95,12-1	CATCAATCACTACCA TCT CACTTAACCCTTACA TCT CA
P99,10-1	CACTCTTCTTTCCCA TCT CACTTTCTATTCACA TCT CA
P100,10-1	CAAACACCTCATCCA TCT CAACAAACCACCTCA TCT CA
P101,10-1	CACTCCACAACTACA TCT CAACAAACCACCTCA TCT CA
P102,10-1	CAAACTACACAATCA TCT CAACAAACCACCTCA TCT CA
P103,11-1	CATCTTTCCATCCCA TCT CATTCAATACAACCA TCT CA
P104,11-1	CATCCATCCTACACA TCT CATTCAATACAACCA TCT CA
P105,12-1	CACAACTTCCCACCA TCT CACTTAACCCTTACA TCT CA
P106,12-1	CACCAATCATACCCA TCT CACTTAACCCTTACA TCT CA
P107,12-1	CAAATCCACCAACCA TCT CACTTAACCCTTACA TCT CA
P111,14-1	CACCCTCCCTTCTCA TCT CATACCTTTCCACCA TCT CA
P112,14-1	CATCACATACCTACA TCT CATACCTTTCCACCA TCT CA
P113,14-1	CAAATCTTTCACCCA TCT CATACCTTTCCACCA TCT CA
P114,13-1	CAATCCTATTCAACA TCT CATTACCAACTTACA TCT CA
P115,15-1	CAAACATTCTACACA TCT CATACTATACCTTCA TCT CA
P116,15-1	CAAAACTATTCCTCA TCT CATACTATACCTTCA TCT CA
P117,16-1	CAACTAACCTTCACA TCT CATCCCTACTTTTCA TCT CA
P118,16-1	CACCACTATACTCCA TCT CATCCCTACTTTTCA TCT CA
P123,13-1	CACACACTCAATCCA TCT CATTACCAACTTACA TCT CA
P124,13-1	CAAACCTCCCTCCCA TCT CATTACCAACTTACA TCT CA
P125,14-1	CATCCAACTCTACCA TCT CATACCTTTCCACCA TCT CA
P126,13-1	CATTCATCTCTTCCA TCT CATTACCAACTTACA TCT CA
P127,15-1	CACCTCCTTTACCCA TCT CATACTATACCTTCA TCT CA
P128,15-1	CAACAATCTCATACA TCT CATACTATACCTTCA TCT CA
P129,15-1	CACCATAACTTCTCA TCT CATACTATACCTTCA TCT CA
P17,1-2	CATTACTTATCCACA TCT CATTCCCACTAACCA TCT CA
P18,1-2	CAATCTCTCCAAACA TCT CATTCCCACTAACCA TCT CA
P29,1-2	CACCATCAACTATCA TCT CATTCCCACTAACCA TCT CA
P30,1-2	CAACTATACAATCCA TCT CATTCCCACTAACCA TCT CA
P31,3-2	CACTTCAACACACCA TCT CAATCCACTTTCACA TCT CA
P32,3-2	CAACTCTCTACATCA TCT CAATCCACTTTCACA TCT CA
P33,3-2	CACATCATCATATCA TCT CAATCCACTTTCACA TCT CA
P34,4-2	CATATCATACTCCCA TCT CATATCCCACTTCCA TCT CA
P39,6-2	CATTACACACCCACA TCT CACTTACCTAACCCA TCT CA
P40,5-2	CAATCAAACATCCCA TCT CATACACCCTTAACA TCT CA
P41,5-2	CACCTTACCAAACCA TCT CATACACCCTTAACA TCT CA
P42,5-2	CACCTTCAAATCCCA TCT CATACACCCTTAACA TCT CA
P43,8-2	CAATACCCACTCTCA TCT CATCTCTACCCTTCA TCT CA
P44,7-2	CAACTCCTACTATCA TCT CATACCCTTATCCCA TCT CA
P45,8-2	CACCTACTCTCCTCA TCT CATCTCTACCCTTCA TCT CA
P46,7-2	CACATCCATACCTCA TCT CATACCCTTATCCCA TCT CA
P51,5-2	CACTTCTACAATTCA TCT CATACACCCTTAACA TCT CA
P52,6-2	CAACCTTCTCCTCCA TCT CACTTACCTAACCCA TCT CA
P53,5-2	CAAACTCCTCTAACA TCT CATACACCCTTAACA TCT CA
P54,5-2	CACTCTCTTCAACCA TCT CATACACCCTTAACA TCT CA
P55,7-2	CATCCCATTTCAACA TCT CATACCCTTATCCCA TCT CA
P56,8-2	CATTTCTCATCACCA TCT CATCTCTACCCTTCA TCT CA
P57,7-2	CATCAAATCTACTCA TCT CATACCCTTATCCCA TCT CA
P58,8-2	CACTCCTAATCTTCA TCT CATCTCTACCCTTCA TCT CA
P59,7-2	CAACCTCTCCTATCA TCT CATACCCTTATCCCA TCT CA
P63,5-2	CAACCAACATAACCA TCT CATACACCCTTAACA TCT CA
P64,6-2	CATAACCTTTCTTCA TCT CACTTACCTAACCCA TCT CA
P65,5-2	CAACATACCAAATCA TCT CATACACCCTTAACA TCT CA
P66,5-2	CATCCACACTCTTCA TCT CATACACCCTTAACA TCT CA
P67,7-2	CAACCATACCACTCA TCT CATACCCTTATCCCA TCT CA
P68,7-2	CATTCTTCACTAACA TCT CATACCCTTATCCCA TCT CA
P69,7-2	CACACTAACTCTCCA TCT CATACCCTTATCCCA TCT CA
P70,8-2	CACCACAACCTACCA TCT CATCTCTACCCTTCA TCT CA
P71,7-2	CACCTTTACATTCCA TCT CATACCCTTATCCCA TCT CA
P76,9-2	CAACACTTTCCTACA TCT CACTTTCTATTCACA TCT CA
P77,9-2	CACACAATACCTCCA TCT CACTTTCTATTCACA TCT CA
P78,9-2	CAATCCCATCCTTCA TCT CACTTTCTATTCACA TCT CA
P79,12-2	CATTTCCTATCCTCA TCT CACTTAACCCTTACA TCT CA
P80,11-2	CACTCTCATAATCCA TCT CATTCAATACAACCA TCT CA
P81,12-2	CAATCATCTATTCCA TCT CACTTAACCCTTACA TCT CA
P82,11-2	CACATCTTCTTCCCA TCT CATTCAATACAACCA TCT CA
P83,11-2	CAATTCATCATCTCA TCT CATTCAATACAACCA TCT CA
P87,9-2	CAAAACATACTTCCA TCT CACTTTCTATTCACA TCT CA
P88,10-2	CAACCACACACATCA TCT CAACAAACCACCTCA TCT CA
P89,9-2	CACACATTCAACCCA TCT CACTTTCTATTCACA TCT CA
P90,9-2	CATCTAACCTCTTCA TCT CACTTTCTATTCACA TCT CA
P91,11-2	CAATACTACCTTCCA TCT CATTCAATACAACCA TCT CA
P92,12-2	CATCCTCAACACCCA TCT CACTTAACCCTTACA TCT CA
P93,11-2	CACACCCTCACTACA TCT CATTCAATACAACCA TCT CA
P94,12-2	CACCTCACATTTCCA TCT CACTTAACCCTTACA TCT CA
P95,11-2	CATCAATCACTACCA TCT CATTCAATACAACCA TCT CA
P98,9-2	CATCCTAACCTAACA TCT CACTTTCTATTCACA TCT CA
P99,9-2	CACTCTTCTTTCCCA TCT CACTTTCTATTCACA TCT CA
P100,10-2	CAAACACCTCATCCA TCT CAACAAACCACCTCA TCT CA
P101,9-2	CACTCCACAACTACA TCT CACTTTCTATTCACA TCT CA
P102,9-2	CAAACTACACAATCA TCT CACTTTCTATTCACA TCT CA
P103,11-2	CATCTTTCCATCCCA TCT CATTCAATACAACCA TCT CA
P104,11-2	CATCCATCCTACACA TCT CATTCAATACAACCA TCT CA
P105,11-2	CACAACTTCCCACCA TCT CATTCAATACAACCA TCT CA
P106,12-2	CACCAATCATACCCA TCT CACTTAACCCTTACA TCT CA
P107,11-2	CAAATCCACCAACCA TCT CATTCAATACAACCA TCT CA
P111,14-2	CACCCTCCCTTCTCA TCT CATACCTTTCCACCA TCT CA
P112,13-2	CATCACATACCTACA TCT CATTACCAACTTACA TCT CA
P113,13-2	CAAATCTTTCACCCA TCT CATTACCAACTTACA TCT CA
P114,13-2	CAATCCTATTCAACA TCT CATTACCAACTTACA TCT CA
P115,16-2	CAAACATTCTACACA TCT CATCCCTACTTTTCA TCT CA
P116,15-2	CAAAACTATTCCTCA TCT CATACTATACCTTCA TCT CA
P118,15-2	CACCACTATACTCCA TCT CATACTATACCTTCA TCT CA
P123,13-2	CACACACTCAATCCA TCT CATTACCAACTTACA TCT CA
P124,14-2	CAAACCTCCCTCCCA TCT CATACCTTTCCACCA TCT CA
P125,13-2	CATCCAACTCTACCA TCT CATTACCAACTTACA TCT CA
P126,13-2	CATTCATCTCTTCCA TCT CATTACCAACTTACA TCT CA
P127,15-2	CACCTCCTTTACCCA TCT CATACTATACCTTCA TCT CA
P129,15-2	CACCATAACTTCTCA TCT CATACTATACCTTCA TCT CA
P130,16-2	CATCTACCTATCACA TCT CATCCCTACTTTTCA TCT CA
P16,1-3	CATTCACTATCTACA TCT CATTCCCACTAACCA TCT CA
P17,1-3	CATTACTTATCCACA TCT CATTCCCACTAACCA TCT CA
P21,4-3	CATAACATATCACCA TCT CATATCCCACTTCCA TCT CA
P22,3-3	CACAAACCTACACCA TCT CAATCCACTTTCACA TCT CA
P23,3-3	CAATCACCCTATACA TCT CAATCCACTTTCACA TCT CA
P27,1-3	CAATCTACCAAAACA TCT CATTCCCACTAACCA TCT CA
P28,1-3	CATTTCACAACACCA TCT CATTCCCACTAACCA TCT CA
P29,1-3	CACCATCAACTATCA TCT CATTCCCACTAACCA TCT CA
P30,2-3	CAACTATACAATCCA TCT CAAACTTACTATCCA TCT CA
P31,4-3	CACTTCAACACACCA TCT CATATCCCACTTCCA TCT CA
P32,3-3	CAACTCTCTACATCA TCT CAATCCACTTTCACA TCT CA
P33,3-3	CACATCATCATATCA TCT CAATCCACTTTCACA TCT CA
P34,3-3	CATATCATACTCCCA TCT CAATCCACTTTCACA TCT CA
P35,3-3	CATCTCCTTCTACCA TCT CAATCCACTTTCACA TCT CA
P39,5-3	CATTACACACCCACA TCT CATACACCCTTAACA TCT CA
P40,6-3	CAATCAAACATCCCA TCT CACTTACCTAACCCA TCT CA
P41,5-3	CACCTTACCAAACCA TCT CATACACCCTTAACA TCT CA
P42,5-3	CACCTTCAAATCCCA TCT CATACACCCTTAACA TCT CA
P43,7-3	CAATACCCACTCTCA TCT CATACCCTTATCCCA TCT CA
P44,7-3	CAACTCCTACTATCA TCT CATACCCTTATCCCA TCT CA
P45,7-3	CACCTACTCTCCTCA TCT CATACCCTTATCCCA TCT CA
P46,8-3	CACATCCATACCTCA TCT CATCTCTACCCTTCA TCT CA
P47,7-3	CATCTTCCTCCCACA TCT CATACCCTTATCCCA TCT CA
P52,5-3	CAACCTTCTCCTCCA TCT CATACACCCTTAACA TCT CA
P53,5-3	CAAACTCCTCTAACA TCT CATACACCCTTAACA TCT CA
P54,6-3	CACTCTCTTCAACCA TCT CACTTACCTAACCCA TCT CA
P55,8-3	CATCCCATTTCAACA TCT CATCTCTACCCTTCA TCT CA
P56,8-3	CATTTCTCATCACCA TCT CATCTCTACCCTTCA TCT CA
P57,8-3	CATCAAATCTACTCA TCT CATCTCTACCCTTCA TCT CA
P58,7-3	CACTCCTAATCTTCA TCT CATACCCTTATCCCA TCT CA
P59,7-3	CAACCTCTCCTATCA TCT CATACCCTTATCCCA TCT CA
P63,5-3	CAACCAACATAACCA TCT CATACACCCTTAACA TCT CA
P64,5-3	CATAACCTTTCTTCA TCT CATACACCCTTAACA TCT CA
P65,5-3	CAACATACCAAATCA TCT CATACACCCTTAACA TCT CA
P66,6-3	CATCCACACTCTTCA TCT CACTTACCTAACCCA TCT CA
P67,8-3	CAACCATACCACTCA TCT CATCTCTACCCTTCA TCT CA
P68,7-3	CATTCTTCACTAACA TCT CATACCCTTATCCCA TCT CA
P69,7-3	CACACTAACTCTCCA TCT CATACCCTTATCCCA TCT CA
P70,7-3	CACCACAACCTACCA TCT CATACCCTTATCCCA TCT CA
P75,9-3	CACCTCTACTACTCA TCT CACTTTCTATTCACA TCT CA
P76,10-3	CAACACTTTCCTACA TCT CAACAAACCACCTCA TCT CA
P77,9-3	CACACAATACCTCCA TCT CACTTTCTATTCACA TCT CA
P78,9-3	CAATCCCATCCTTCA TCT CACTTTCTATTCACA TCT CA
P79,11-3	CATTTCCTATCCTCA TCT CATTCAATACAACCA TCT CA
P80,11-3	CACTCTCATAATCCA TCT CATTCAATACAACCA TCT CA
P81,11-3	CAATCATCTATTCCA TCT CATTCAATACAACCA TCT CA
P82,12-3	CACATCTTCTTCCCA TCT CACTTAACCCTTACA TCT CA
P87,10-3	CAAAACATACTTCCA TCT CAACAAACCACCTCA TCT CA
P88,9-3	CAACCACACACATCA TCT CACTTTCTATTCACA TCT CA
P89,9-3	CACACATTCAACCCA TCT CACTTTCTATTCACA TCT CA
P90,10-3	CATCTAACCTCTTCA TCT CAACAAACCACCTCA TCT CA
P91,12-3	CAATACTACCTTCCA TCT CACTTAACCCTTACA TCT CA
P92,12-3	CATCCTCAACACCCA TCT CACTTAACCCTTACA TCT CA
P93,12-3	CACACCCTCACTACA TCT CACTTAACCCTTACA TCT CA
P94,11-3	CACCTCACATTTCCA TCT CATTCAATACAACCA TCT CA
P98,9-3	CATCCTAACCTAACA TCT CACTTTCTATTCACA TCT CA
P99,9-3	CACTCTTCTTTCCCA TCT CACTTTCTATTCACA TCT CA
P100,9-3	CAAACACCTCATCCA TCT CACTTTCTATTCACA TCT CA
P101,9-3	CACTCCACAACTACA TCT CACTTTCTATTCACA TCT CA
P102,10-3	CAAACTACACAATCA TCT CAACAAACCACCTCA TCT CA
P103,12-3	CATCTTTCCATCCCA TCT CACTTAACCCTTACA TCT CA
P104,11-3	CATCCATCCTACACA TCT CATTCAATACAACCA TCT CA
P105,11-3	CACAACTTCCCACCA TCT CATTCAATACAACCA TCT CA
P106,11-3	CACCAATCATACCCA TCT CATTCAATACAACCA TCT CA
P110,13-3	CAACCCACAAAACCA TCT CATTACCAACTTACA TCT CA
P111,13-3	CACCCTCCCTTCTCA TCT CATTACCAACTTACA TCT CA
P112,14-3	CATCACATACCTACA TCT CATACCTTTCCACCA TCT CA
P113,13-3	CAAATCTTTCACCCA TCT CATTACCAACTTACA TCT CA
P114,13-3	CAATCCTATTCAACA TCT CATTACCAACTTACA TCT CA
P116,15-3	CAAAACTATTCCTCA TCT CATACTATACCTTCA TCT CA
P117,15-3	CAACTAACCTTCACA TCT CATACTATACCTTCA TCT CA
P123,14-3	CACACACTCAATCCA TCT CATACCTTTCCACCA TCT CA
P124,13-3	CAAACCTCCCTCCCA TCT CATTACCAACTTACA TCT CA
P125,13-3	CATCCAACTCTACCA TCT CATTACCAACTTACA TCT CA
P129,16-3	CACCATAACTTCTCA TCT CATCCCTACTTTTCA TCT CA
P130,15-3	CATCTACCTATCACA TCT CATACTATACCTTCA TCT CA
P17,1-4	CATTACTTATCCACA TCT CATTCCCACTAACCA TCT CA
P19,4-4	CACACCAACAACTCA TCT CATATCCCACTTCCA TCT CA
P21,4-4	CATAACATATCACCA TCT CATATCCCACTTCCA TCT CA
P27,2-4	CAATCTACCAAAACA TCT CAAACTTACTATCCA TCT CA
P28,1-4	CATTTCACAACACCA TCT CATTCCCACTAACCA TCT CA
P29,1-4	CACCATCAACTATCA TCT CATTCCCACTAACCA TCT CA
P30,2-4	CAACTATACAATCCA TCT CAAACTTACTATCCA TCT CA
P31,3-4	CACTTCAACACACCA TCT CAATCCACTTTCACA TCT CA
P32,3-4	CAACTCTCTACATCA TCT CAATCCACTTTCACA TCT CA
P33,4-4	CACATCATCATATCA TCT CATATCCCACTTCCA TCT CA
P34,3-4	CATATCATACTCCCA TCT CAATCCACTTTCACA TCT CA
P38,5-4	CAATTCTCCTACCCA TCT CATACACCCTTAACA TCT CA
P39,5-4	CATTACACACCCACA TCT CATACACCCTTAACA TCT CA
P40,5-4	CAATCAAACATCCCA TCT CATACACCCTTAACA TCT CA
P41,5-4	CACCTTACCAAACCA TCT CATACACCCTTAACA TCT CA
P42,6-4	CACCTTCAAATCCCA TCT CACTTACCTAACCCA TCT CA
P43,8-4	CAATACCCACTCTCA TCT CATCTCTACCCTTCA TCT CA
P44,7-4	CAACTCCTACTATCA TCT CATACCCTTATCCCA TCT CA
P45,7-4	CACCTACTCTCCTCA TCT CATACCCTTATCCCA TCT CA
P46,7-4	CACATCCATACCTCA TCT CATACCCTTATCCCA TCT CA
P51,6-4	CACTTCTACAATTCA TCT CACTTACCTAACCCA TCT CA
P52,6-4	CAACCTTCTCCTCCA TCT CACTTACCTAACCCA TCT CA
P53,5-4	CAAACTCCTCTAACA TCT CATACACCCTTAACA TCT CA
P54,6-4	CACTCTCTTCAACCA TCT CACTTACCTAACCCA TCT CA
P55,8-4	CATCCCATTTCAACA TCT CATCTCTACCCTTCA TCT CA
P56,8-4	CATTTCTCATCACCA TCT CATCTCTACCCTTCA TCT CA
P57,8-4	CATCAAATCTACTCA TCT CATCTCTACCCTTCA TCT CA
P58,8-4	CACTCCTAATCTTCA TCT CATCTCTACCCTTCA TCT CA
P63,6-4	CAACCAACATAACCA TCT CACTTACCTAACCCA TCT CA
P64,5-4	CATAACCTTTCTTCA TCT CATACACCCTTAACA TCT CA
P65,5-4	CAACATACCAAATCA TCT CATACACCCTTAACA TCT CA
P66,6-4	CATCCACACTCTTCA TCT CACTTACCTAACCCA TCT CA
P67,7-4	CAACCATACCACTCA TCT CATACCCTTATCCCA TCT CA
P68,7-4	CATTCTTCACTAACA TCT CATACCCTTATCCCA TCT CA
P69,8-4	CACACTAACTCTCCA TCT CATCTCTACCCTTCA TCT CA
P70,7-4	CACCACAACCTACCA TCT CATACCCTTATCCCA TCT CA
P75,9-4	CACCTCTACTACTCA TCT CACTTTCTATTCACA TCT CA
P76,9-4	CAACACTTTCCTACA TCT CACTTTCTATTCACA TCT CA
P77,9-4	CACACAATACCTCCA TCT CACTTTCTATTCACA TCT CA
P78,10-4	CAATCCCATCCTTCA TCT CAACAAACCACCTCA TCT CA
P79,12-4	CATTTCCTATCCTCA TCT CACTTAACCCTTACA TCT CA
P80,11-4	CACTCTCATAATCCA TCT CATTCAATACAACCA TCT CA
P81,11-4	CAATCATCTATTCCA TCT CATTCAATACAACCA TCT CA
P82,11-4	CACATCTTCTTCCCA TCT CATTCAATACAACCA TCT CA
P87,10-4	CAAAACATACTTCCA TCT CAACAAACCACCTCA TCT CA
P88,10-4	CAACCACACACATCA TCT CAACAAACCACCTCA TCT CA
P89,9-4	CACACATTCAACCCA TCT CACTTTCTATTCACA TCT CA
P90,10-4	CATCTAACCTCTTCA TCT CAACAAACCACCTCA TCT CA
P91,12-4	CAATACTACCTTCCA TCT CACTTAACCCTTACA TCT CA
P92,12-4	CATCCTCAACACCCA TCT CACTTAACCCTTACA TCT CA
P93,12-4	CACACCCTCACTACA TCT CACTTAACCCTTACA TCT CA
P94,12-4	CACCTCACATTTCCA TCT CACTTAACCCTTACA TCT CA
P95,11-4	CATCAATCACTACCA TCT CATTCAATACAACCA TCT CA
P99,10-4	CACTCTTCTTTCCCA TCT CAACAAACCACCTCA TCT CA
P100,9-4	CAAACACCTCATCCA TCT CACTTTCTATTCACA TCT CA
P101,9-4	CACTCCACAACTACA TCT CACTTTCTATTCACA TCT CA
P102,10-4	CAAACTACACAATCA TCT CAACAAACCACCTCA TCT CA
P103,11-4	CATCTTTCCATCCCA TCT CATTCAATACAACCA TCT CA
P104,11-4	CATCCATCCTACACA TCT CATTCAATACAACCA TCT CA
P105,12-4	CACAACTTCCCACCA TCT CACTTAACCCTTACA TCT CA
P106,11-4	CACCAATCATACCCA TCT CATTCAATACAACCA TCT CA
P107,11-4	CAAATCCACCAACCA TCT CATTCAATACAACCA TCT CA
P111,13-4	CACCCTCCCTTCTCA TCT CATTACCAACTTACA TCT CA
P112,13-4	CATCACATACCTACA TCT CATTACCAACTTACA TCT CA
P113,13-4	CAAATCTTTCACCCA TCT CATTACCAACTTACA TCT CA
P114,14-4	CAATCCTATTCAACA TCT CATACCTTTCCACCA TCT CA
P115,16-4	CAAACATTCTACACA TCT CATCCCTACTTTTCA TCT CA
P116,15-4	CAAAACTATTCCTCA TCT CATACTATACCTTCA TCT CA
P117,15-4	CAACTAACCTTCACA TCT CATACTATACCTTCA TCT CA
P118,15-4	CACCACTATACTCCA TCT CATACTATACCTTCA TCT CA
P124,14-4	CAAACCTCCCTCCCA TCT CATACCTTTCCACCA TCT CA
P125,13-4	CATCCAACTCTACCA TCT CATTACCAACTTACA TCT CA
P127,16-4	CACCTCCTTTACCCA TCT CATCCCTACTTTTCA TCT CA
P128,16-4	CAACAATCTCATACA TCT CATCCCTACTTTTCA TCT CA
P129,16-4	CACCATAACTTCTCA TCT CATCCCTACTTTTCA TCT CA
B1-1	CCACTGC CTACAACATCTAAACACACAGTTGTAG
B2-1	CCACTGC CTATCCTCTCAACTACCCTCAGGATAG
B3-1	CCACTGC CTTTTCTCACCTCCATCAATAGAAAAG
B4-1	CCACTGC CCTATCTTAACAATTCCCTCAGATAGG
B5-1	CCACTGC CACTCACATAACTCCATACAGTGAGTG
B6-1	CCACTGC CCCAAACATTCACATATCCAGTTTGGG
B7-1	CCACTGC CCTTTCATTTCCTCTTTCATTGAAAGG
B8-1	CCACTGC CACTTTCATAACCCACCTCAGAAAGTG
B9-1	CCACTGC CCTTCTCTCTTAACTCTTTCGAGAAGG
B10-1	CCACTGC CTAACCATATCCACATCCATTGGTTAG
B11-1	CCACTGC CTTTCTATCTCATTCCCACCTAGAAAG
B12-1	CCACTGC CTTTCTCAACCTTCCCAAACGAGAAAG
B13-1	CCACTGC CAACTCTCTTTACCACCCTTAGAGTTG
B14-1	CCACTGC CTCTTACACTTTACCTATTCGTAAGAG
B15-1	CCACTGC CCATACAATCCAACTTCACATGTATGG
B16-1	CCACTGC CACCAATTCACATCATTCCTATTGGTG
B17-1	CCACTGC CACTCTCTGTTTTATGATTTGAGAGTG
B18-1	CCACTGC CCACTCCTAGTTTGTTGTAGGGAGTGG
B1-2	CACTCGC CATTCACCTCAAACAACATTGTGAATG
B2-2	CACTCGC CAATCAACTCTCATCCTATTTTGATTG
B3-2	CACTCGC CTTATCAAATCTACTCACCATGATAAG
B4-2	CACTCGC CCACACATATCTTCTCATTTTGTGTGG
B5-2	CACTCGC CTCCACACTCTTACTAATCTTGTGGAG
B6-2	CACTCGC CAACCTCTACTCTTATCCTTGAGGTTG
B7-2	CACTCGC CTTTCTTCTCTAAACTACTCAAGAAAG
B8-2	CACTCGC CTCCTTCCACCTAAACTTATGAAGGAG
B9-2	CACTCGC CACTTCACCACATCTCACTCTGAAGTG
B10-2	CACTCGC CCTATCTCCAATACATTCATAGATAGG
B11-2	CACTCGC CATCATCATATCATACTCCAGATGATG
B12-2	CACTCGC CCTCACAATTCTTTACACTATGTGAGG
B13-2	CACTCGC CCCTACATCTCCATTCATATTGTAGGG
B14-2	CACTCGC CACAATCTCATAACACAAACGATTGTG
B15-2	CACTCGC CCCATCAACTATACAATCTATGATGGG
B16-2	CACTCGC CAAACCTTAACACCTACAATAGGTTTG
B17-2	CACTCGC CACCTCCCAATCATACCTATGGAGGTG
B18-2	CACTCGC CTAACTACATACCCTCTTATTAGTTAG
B1-3	CGTCCTC CACCTCACCCTCTCCATATCTGAGGTG
B2-3	CGTCCTC CTACTTCAATTCCTCCACCAGAAGTAG
B3-3	CGTCCTC CTACCACACCTAACTTCTAAGTGGTAG
B4-3	CGTCCTC CCTTTACATTCCTCTATCTAGTAAAGG
B5-3	CGTCCTC CCTACTCTCCTTCTACAATTGAGTAGG
B6-3	CGTCCTC CCATTCTAACTCATCCAATAAGAATGG
B7-3	CGTCCTC CCTCTCACTACTTCACCTTCTGAGAGG
B8-3	CGTCCTC CACTACCCAATACTTTACAAGGTAGTG
B9-3	CGTCCTC CCTTACCAAACCTACACATCGGTAAGG
B10-3	CGTCCTC CCCTCTAACCACAACTCTTATAGAGGG
B11-3	CGTCCTC CATAACTACCTCCTACATAAAGTTATG
B12-3	CGTCCTC CCATCTTATCAATACAACCAAAGATGG
B13-3	CGTCCTC CTCTCCACTCCTTACTTCTTTGGAGAG
B14-3	CGTCCTC CTACACCACCAAAACAAACAGGTGTAG
B15-3	CGTCCTC CCCTATCAATCTCACCTTAAGATAGGG
B16-3	CGTCCTC CTACACTACTTATCTAACCAAGTGTAG
B17-3	CGTCCTC CTTCCTCATCTCTTCACATAGAGGAAG
B18-3	CGTCCTC CTCTCAACACCCTCACTATTTTGAGAG
B1-4	CTGCTCC CTCCCAAACATCCATTTCCATTGGGAG
B2-4	CTGCTCC CATCTTCTTCCTCCCACACTGAAGATG
B3-4	CTGCTCC CTCTAACAACACTACCAATAGTTAGAG
B4-4	CTGCTCC CTACTCCTAACCTAACAAATGGAGTAG
B5-4	CTGCTCC CTTACCAACTTACTCAACAATGGTAAG
B6-4	CTGCTCC CATTCCACAAACCACCTAATTGGAATG
B7-4	CTGCTCC CATTCATCATCTATTCCCTTATGAATG
B8-4	CTGCTCC CTTTTCATACCCTTCCCTCCTGAAAAG
B9-4	CTGCTCC CTTCACAACACTAATCCATATGTGAAG
B10-4	CTGCTCC CTACTCCCAAAACTTTCCAAGGAGTAG
B11-4	CTGCTCC CACATCCTATTCAAACACATGGATGTG
B12-4	CTGCTCC CCTCCACAACTACACAATCAGTGGAGG
B13-4	CTGCTCC CTCACCACTCATCTCAATTCTGGTGAG
B14-4	CTGCTCC CTTTCATCCCTTACTCTTTTATGAAAG
B15-4	CTGCTCC CCCACCCACATCACTTCTCAGGGTGGG
B16-4	CTGCTCC CATCAATCACACCTATCCACATTGATG
B17-4	CTGCTCC CATCCCTAACTAATCATAACAGGGATG
B18-4	CTGCTCC CTTCACCATCTACACTTCTAGGTGAAG
W1-1	CTACAACTGTGTGTTTAGATGTTGTAG GCAGTGG GAGTAGAAGAGAGAGAAG
W2-1	CTATCCTGAGGGTAGTTGAGAGGATAG GCAGTGG GAGTAGAAGAGAGAGAAG
W3-1	CTTTTCTATTGATGGAGGTGAGAAAAG GCAGTGG GAGTAGAAGAGAGAGAAG
W4-1	CCTATCTGAGGGAATTGTTAAGATAGG GCAGTGG GAGTAGAAGAGAGAGAAG
W5-1	CACTCACTGTATGGAGTTATGTGAGTG GCAGTGG GAGTAGAAGAGAGAGAAG
W6-1	CCCAAACTGGATATGTGAATGTTTGGG GCAGTGG GAGTAGAAGAGAGAGAAG
W7-1	CCTTTCAATGAAAGAGGAAATGAAAGG GCAGTGG GAGTAGAAGAGAGAGAAG
W8-1	CACTTTCTGAGGTGGGTTATGAAAGTG GCAGTGG GAGTAGAAGAGAGAGAAG
W9-1	CCTTCTCGAAAGAGTTAAGAGAGAAGG GCAGTGG GAGTAGAAGAGAGAGAAG
W10-1	CTAACCAATGGATGTGGATATGGTTAG GCAGTGG GAGTAGAAGAGAGAGAAG
W11-1	CTTTCTAGGTGGGAATGAGATAGAAAG GCAGTGG GAGTAGAAGAGAGAGAAG
W12-1	CTTTCTCGTTTGGGAAGGTTGAGAAAG GCAGTGG GAGTAGAAGAGAGAGAAG
W13-1	CAACTCTAAGGGTGGTAAAGAGAGTTG GCAGTGG GAGTAGAAGAGAGAGAAG
W14-1	CTCTTACGAATAGGTAAAGTGTAAGAG GCAGTGG GAGTAGAAGAGAGAGAAG
W15-1	CCATACATGTGAAGTTGGATTGTATGG GCAGTGG GAGTAGAAGAGAGAGAAG
W16-1	CACCAATAGGAATGATGTGAATTGGTG GCAGTGG GAGTAGAAGAGAGAGAAG
W17-1	CACTCTCAAATCATAAAACAGAGAGTG GCAGTGG GAGTAGAAGAGAGAGAAG
W18-1	CCACTCCCTACAACAAACTAGGAGTGG GCAGTGG GAGTAGAAGAGAGAGAAG
W1-2	CATTCACAATGTTGTTTGAGGTGAATG GCGAGTG GAGTAGAAGAGAGAGTGA
W2-2	CAATCAAAATAGGATGAGAGTTGATTG GCGAGTG GAGTAGAAGAGAGAGTGA
W3-2	CTTATCATGGTGAGTAGATTTGATAAG GCGAGTG GAGTAGAAGAGAGAGTGA
W4-2	CCACACAAAATGAGAAGATATGTGTGG GCGAGTG GAGTAGAAGAGAGAGTGA
W5-2	CTCCACAAGATTAGTAAGAGTGTGGAG GCGAGTG GAGTAGAAGAGAGAGTGA
W6-2	CAACCTCAAGGATAAGAGTAGAGGTTG GCGAGTG GAGTAGAAGAGAGAGTGA
W7-2	CTTTCTTGAGTAGTTTAGAGAAGAAAG GCGAGTG GAGTAGAAGAGAGAGTGA
W8-2	CTCCTTCATAAGTTTAGGTGGAAGGAG GCGAGTG GAGTAGAAGAGAGAGTGA
W9-2	CACTTCAGAGTGAGATGTGGTGAAGTG GCGAGTG GAGTAGAAGAGAGAGTGA
W10-2	CCTATCTATGAATGTATTGGAGATAGG GCGAGTG GAGTAGAAGAGAGAGTGA
W11-2	CATCATCTGGAGTATGATATGATGATG GCGAGTG GAGTAGAAGAGAGAGTGA
W12-2	CCTCACATAGTGTAAAGAATTGTGAGG GCGAGTG GAGTAGAAGAGAGAGTGA
W13-2	CCCTACAATATGAATGGAGATGTAGGG GCGAGTG GAGTAGAAGAGAGAGTGA
W14-2	CACAATCGTTTGTGTTATGAGATTGTG GCGAGTG GAGTAGAAGAGAGAGTGA
W15-2	CCCATCATAGATTGTATAGTTGATGGG GCGAGTG GAGTAGAAGAGAGAGTGA
W16-2	CAAACCTATTGTAGGTGTTAAGGTTTG GCGAGTG GAGTAGAAGAGAGAGTGA
W17-2	CACCTCCATAGGTATGATTGGGAGGTG GCGAGTG GAGTAGAAGAGAGAGTGA
W18-2	CTAACTAATAAGAGGGTATGTAGTTAG GCGAGTG GAGTAGAAGAGAGAGTGA
W1-3	CACCTCAGATATGGAGAGGGTGAGGTG GAGGACG GAGTAGAAGAGAGAGTAG
W2-3	CTACTTCTGGTGGAGGAATTGAAGTAG GAGGACG GAGTAGAAGAGAGAGTAG
W3-3	CTACCACTTAGAAGTTAGGTGTGGTAG GAGGACG GAGTAGAAGAGAGAGTAG
W4-3	CCTTTACTAGATAGAGGAATGTAAAGG GAGGACG GAGTAGAAGAGAGAGTAG
W5-3	CCTACTCAATTGTAGAAGGAGAGTAGG GAGGACG GAGTAGAAGAGAGAGTAG
W6-3	CCATTCTTATTGGATGAGTTAGAATGG GAGGACG GAGTAGAAGAGAGAGTAG
W7-3	CCTCTCAGAAGGTGAAGTAGTGAGAGG GAGGACG GAGTAGAAGAGAGAGTAG
W8-3	CACTACCTTGTAAAGTATTGGGTAGTG GAGGACG GAGTAGAAGAGAGAGTAG
W9-3	CCTTACCGATGTGTAGGTTTGGTAAGG GAGGACG GAGTAGAAGAGAGAGTAG
W10-3	CCCTCTATAAGAGTTGTGGTTAGAGGG GAGGACG GAGTAGAAGAGAGAGTAG
W11-3	CATAACTTTATGTAGGAGGTAGTTATG GAGGACG GAGTAGAAGAGAGAGTAG
W12-3	CCATCTTTGGTTGTATTGATAAGATGG GAGGACG GAGTAGAAGAGAGAGTAG
W13-3	CTCTCCAAAGAAGTAAGGAGTGGAGAG GAGGACG GAGTAGAAGAGAGAGTAG
W14-3	CTACACCTGTTTGTTTTGGTGGTGTAG GAGGACG GAGTAGAAGAGAGAGTAG
W15-3	CCCTATCTTAAGGTGAGATTGATAGGG GAGGACG GAGTAGAAGAGAGAGTAG
W16-3	CTACACTTGGTTAGATAAGTAGTGTAG GAGGACG GAGTAGAAGAGAGAGTAG
W17-3	CTTCCTCTATGTGAAGAGATGAGGAAG GAGGACG GAGTAGAAGAGAGAGTAG
W18-3	CTCTCAAAATAGTGAGGGTGTTGAGAG GAGGACG GAGTAGAAGAGAGAGTAG
W1-4	CTCCCAATGGAAATGGATGTTTGGGAG GGAGCAG GAGTAGAAGAGAGTGGAT
W2-4	CATCTTCAGTGTGGGAGGAAGAAGATG GGAGCAG GAGTAGAAGAGAGTGGAT
W3-4	CTCTAACTATTGGTAGTGTTGTTAGAG GGAGCAG GAGTAGAAGAGAGTGGAT
W4-4	CTACTCCATTTGTTAGGTTAGGAGTAG GGAGCAG GAGTAGAAGAGAGTGGAT
W5-4	CTTACCATTGTTGAGTAAGTTGGTAAG GGAGCAG GAGTAGAAGAGAGTGGAT
W6-4	CATTCCAATTAGGTGGTTTGTGGAATG GGAGCAG GAGTAGAAGAGAGTGGAT
W7-4	CATTCATAAGGGAATAGATGATGAATG GGAGCAG GAGTAGAAGAGAGTGGAT
W8-4	CTTTTCAGGAGGGAAGGGTATGAAAAG GGAGCAG GAGTAGAAGAGAGTGGAT
W9-4	CTTCACATATGGATTAGTGTTGTGAAG GGAGCAG GAGTAGAAGAGAGTGGAT
W10-4	CTACTCCTTGGAAAGTTTTGGGAGTAG GGAGCAG GAGTAGAAGAGAGTGGAT
W11-4	CACATCCATGTGTTTGAATAGGATGTG GGAGCAG GAGTAGAAGAGAGTGGAT
W12-4	CCTCCACTGATTGTGTAGTTGTGGAGG GGAGCAG GAGTAGAAGAGAGTGGAT
W13-4	CTCACCAGAATTGAGATGAGTGGTGAG GGAGCAG GAGTAGAAGAGAGTGGAT
W14-4	CTTTCATAAAAGAGTAAGGGATGAAAG GGAGCAG GAGTAGAAGAGAGTGGAT
W15-4	CCCACCCTGAGAAGTGATGTGGGTGGG GGAGCAG GAGTAGAAGAGAGTGGAT
W16-4	CATCAATGTGGATAGGTGTGATTGATG GGAGCAG GAGTAGAAGAGAGTGGAT
W17-4	CATCCCTGTTATGATTAGTTAGGGATG GGAGCAG GAGTAGAAGAGAGTGGAT
W18-4	CTTCACCTAGAAGTGTAGATGGTGAAG GGAGCAG GAGTAGAAGAGAGTGGAT
Ss1,17	CATTCCCACTAACCA TCT CATCACTTCCTTTCA TCT TT CA
`Ss2,18	CAAACTTACTATCCA TCT CACCTATCTTTCTACTCTAC
S3,19	CAATCCACTTTCACA TCT CACTCCCAACCATCA TCT TT CA
`Ss4,20	CATATCCCACTTCCA TCT CATCTACTTACTCACCAAAC
S5,21	CATACACCCTTAACA TCT CACCATTCTAACTCA TCT TT CA
`Ss6,22	CACTTACCTAACCCA TCT CATCTACTCCCATTCATCAC
S7,23	CATACCCTTATCCCA TCT CATATCTCCCACCCA TCT TT CA
`Ss8,24	CATCTCTACCCTTCA TCT ACTCTACATTATCTCCTTAC
S9,25	CACTTTCTATTCACA TCT CACCCTTTCCCTACA TCT TT CA
`Ss10,26	CAACAAACCACCTCA TCT CAATCAAACACAACACCTTC
S11,27	CATTCAATACAACCA TCT CAACATCAAAACCCA TCT TT CA
`Ss12,28	CACTTAACCCTTACA TCT CATACTCTATTCTCATCAAC
S13,29	CATTACCAACTTACA TCT CACTAAACTACTCCA TCT TT CA
`Ss14,30	CATACCTTTCCACCA TCT CAACTTCAATTCCCAACTAC
S15,31	CATACTATACCTTCA TCT CACAATTCCTCCACA TCT TT CA
`Ss16,32	CATCCCTACTTTTCA TCT AACTTCTATCTAACCTCATC
Ss1,17*	TG AGA TGGTTAGTGGGAATG AGA TG
`Ss2,18*	TG AGA TGGATAGTAAGTTTG AGA TG
S3,19*	TG AGA TGTGAAAGTGGATTG AGA TG
`Ss4,20*	TG AGA TGGAAGTGGGATATG AGA TG
S5,21*	TG AGA TGTTAAGGGTGTATG AGA TG
`Ss6,22*	TG AGA TGGGTTAGGTAAGTG AGA TG
S7,23*	TG AGA TGGGATAAGGGTATG AGA TG
`Ss8,24*	TG AGA TGAAGGGTAGAGATG AGA TG
S9,25*	TG AGA TGTGAATAGAAAGTG AGA TG
`Ss10,26*	TG AGA TGAGGTGGTTTGTTG AGA TG
S11,27*	TG AGA TGGTTGTATTGAATG AGA TG
`Ss12,28*	TG AGA TGTAAGGGTTAAGTG AGA TG
S13,29*	TG AGA TGTAAGTTGGTAATG AGA TG
`Ss14,30*	TG AGA TGGTGGAAAGGTATG AGA TG
S15,31*	TG AGA TGAAGGTATAGTATG AGA TG
`Ss16,32*	TG AGA TGAAAAGTAGGGATG AGA TG
Ds17,33	CATCACTTCCTTTCA TCT TT CATCATTACTCATCA TCT CA
Ds19,34	CACTCCCAACCATCA TCT TT CAACCCTTCCCTCCA TCT CA
Ds21,35	CACCATTCTAACTCA TCT TT CAACTACCTCCTACA TCT CA
Ds23,36	CATATCTCCCACCCA TCT TT CACACTCCTTACTCA TCT CA
Ds25,37	CACCCTTTCCCTACA TCT TT CACCCTCCCTTCTCA TCT CA
Ds27,38	CAACATCAAAACCCA TCT TT CAACCTAATCAACCA TCT CA
Ds29,39	CACTAAACTACTCCA TCT TT CACCCATCCAATCCA TCT CA
Ds31,40	CACAATTCCTCCACA TCT TT CACCTAAACAACCCA TCT CA
Ds17,33*	TG AA AGA TGAAAGGAAGTGATG AGA TG
Ds19,34*	TG AA AGA TGATGGTTGGGAGTG AGA TG
Ds21,35*	TG AA AGA TGAGTTAGAATGGTG AGA TG
Ds23,36*	TG AA AGA TGGGTGGGAGATATG AGA TG
Ds25,37*	TG AA AGA TGTAGGGAAAGGGTG AGA TG
Ds27,38*	TG AA AGA TGGGTTTTGATGTTG AGA TG
Ds29,39*	TG AA AGA TGGAGTAGTTTAGTG AGA TG
Ds31,40*	TG AA AGA TGTGGAGGAATTGTG AGA TG
Sub18,33	TG AGA TGATGAGTAATGATG GTAGAGTCACCTATCTTTCTACTCTAC AGA TG AA
Sub20,34	TG AGA TGGAGGGAAGGGTTG GTTTGGTCATCTACTTACTCACCAAAC AGA TG AT
Sub22,35	TG AGA TGTAGGAGGTAGTTG GTGATGACATCTACTCCCATTCATCAC AGA TG AG
Sub24,36	TG AGA TGAGTAAGGAGTGTG GTAAGGAACTCTACATTATCTCCTTAC AGA TG GG
Sub26,37	TG AGA TGAGAAGGGAGGGTG GAAGGTGCAATCAAACACAACACCTTC AGA TG TA
Sub28,38	TG AGA TGGTTGATTAGGTTG GTTGATGCATACTCTATTCTCATCAAC AGA TG GG
Sub30,39	TG AGA TGGATTGGATGGGTG GTAGTTGCAACTTCAATTCCCAACTAC AGA TG GA
Sub32,40	TG AGA TGGGTTGTTTAGGTG GATGAGGAACTTCTATCTAACCTCATC AGA TG TG
In18	GTAGAGTAGAAAGATAGGTG AGA TG GA
In20	GTTTGGTGAGTAAGTAGATG AGA TG GA
In22	GTGATGAATGGGAGTAGATG AGA TG GG
In24	GTAAGGAGATAATGTAGAGT AGA TG AA
In26	GAAGGTGTTGTGTTTGATTG AGA TG AG
In28	GTTGATGAGAATAGAGTATG AGA TG TA
In30	GTAGTTGGGAATT GAAGTTG AGA TG GT
In32	GATGAGGTTAGATAGAAGTT AGA TG AA
C33	CATCATTACTCATCA TCT CAAAAAAAAAAAAAA
C34	CAACCCTTCCCTCCA TCT CAAAAAAAAAAAAAA
C35	CAACTACCTCCTACA TCT CAAAAAAAAAAAAAA
C36	CACACTCCTTACTCA TCT CAAAAAAAAAAAAAA
C37	CACCCTCCCTTCTCA TCT CAAAAAAAAAAAAAA
C38	CAACCTAATCAACCA TCT CAAAAAAAAAAAAAA
C39	CACCCATCCAATCCA TCT CAAAAAAAAAAAAAA
C40	CACCTAAACAACCCA TCT CAAAAAAAAAAAAAA
Rep1	CATCATTACTCATCA TCT CA /FAM/
Rep2	CAACCCTTCCCTCCA TCT CA /ROX/
Rep3	CAACTACCTCCTACA TCT CA /HEX/
Rep4	CACACTCCTTACTCA TCT CA /BHQ-3/
Rep5	CACCCTCCCTTCTCA TCT CA /FAM/
Rep6	CAACCTAATCAACCA TCT CA /ROX/
Rep7	CACCCATCCAATCCA TCT CA /HEX/
Rep8	CACCTAAACAACCCA TCT CA /BHQ-3/
Rep1*	/BHQ-1/ TG AGA TGATGAGTAATGATG GTAGAGTCACCTATCTTTCTACTCTAC AGA TG
Rep2*	/BHQ-2/ TG AGA TGGAGGGAAGGGTTG GTTTGGTCATCTACTTACTCACCAAAC AGA TG
Rep3*	/BHQ-1/ TG AGA TGTAGGAGGTAGTTG GTGATGACATCTACTCCCATTCATCAC AGA TG
Rep4*	/Cy5.5/ TG AGA TGAGTAAGGAGTGTG GTAAGGAACTCTACATTATCTCCTTAC AGA TG
Rep5*	/BHQ-1/ TG AGA TGAGAAGGGAGGGTG GAAAGTTATAACCCACCTCAAACTTTC AGA TG
Rep6*	/BHQ-2/ TG AGA TGGTTGATTAGGTTG GTGATGACATCTACTCCCATTCATCAC AGA TG
Rep7*	/BHQ-1/ TG AGA TGGATTGGATGGGTG GTAAGGAACTCTACATTATCTCCTTAC AGA TG
Rep8*	/Cy5.5/ TG AGA TGGGTTGTTTAGGTG GTAAGGAACTCTACATTATCTCCTTAC AGA TG
Tag1	GCAGTGG GAGTAGAAGAGAG AGAAG GAATGTG AAAAAAAAAAAAA
Tag1-1	CACATTC CTTCT CTCTCTTCTACTC CCACTGC
R1	/FAM/ GCAGTGG GAGTAGAAGAGAG AGAAG
R1-1	CACATTC CTTCT CTCTCTTCTACTC CCACTGC /BHQ-1/
Tag2	GCGAGTG GAGTAGAAGAGAG AGTGA GTAGTAG AAAAAAAAAAAAA
Tag2-1	CTACTAC TCACT CTCTCTTCTACTC CACTCGC
R2	/HEX/ GCGAGTG GAGTAGAAGAGAG AGTGA
R2-1	CTACTAC TCACT CTCTCTTCTACTC CACTCGC /BHQ-1/
Tag3	GAGGACG GAGTAGAAGAGAG AGTAG GAGAGAG AAAAAAAAAAAAA
Tag3-1	CTCTCTCCTACTCTCTCTTCTACTCCGTCCTC
R3	/ROX/ GAGGACG GAGTAGAAGAGAG AGTAG
R3-1	CTCTCTCCTACTCTCTCTTCTACTCCGTCCTC /BHQ-2/
Tag4	GGAGCAG GAGTAGAAGAGAG TGGAT GATTGAG AAAAAAAAAAAAA
Tag4-1	CTCAATCATCCACTCTCTTCTACTCCTGCTCC
R4	/Cy5.5/ GGAGCAG GAGTAGAAGAGAG TGGAT
R4-1	CTCAATCATCCACTCTCTTCTACTCCTGCTCC /BHQ-3/
Release	GAGTAGAAGAGAG GTCAAC
Capture	GTTGAC CTCTCTTCTACTC TTTTTTTTTT /Biotin/-magnetic beads
